# Supplementary material
Source: publisher figshare collection journal article supplement (https://aacr.figshare.com/articles/dataset/_/22540280)
Supplement: Supplementary file 1 [file 40003631]

## Supplementary Figures and Legends

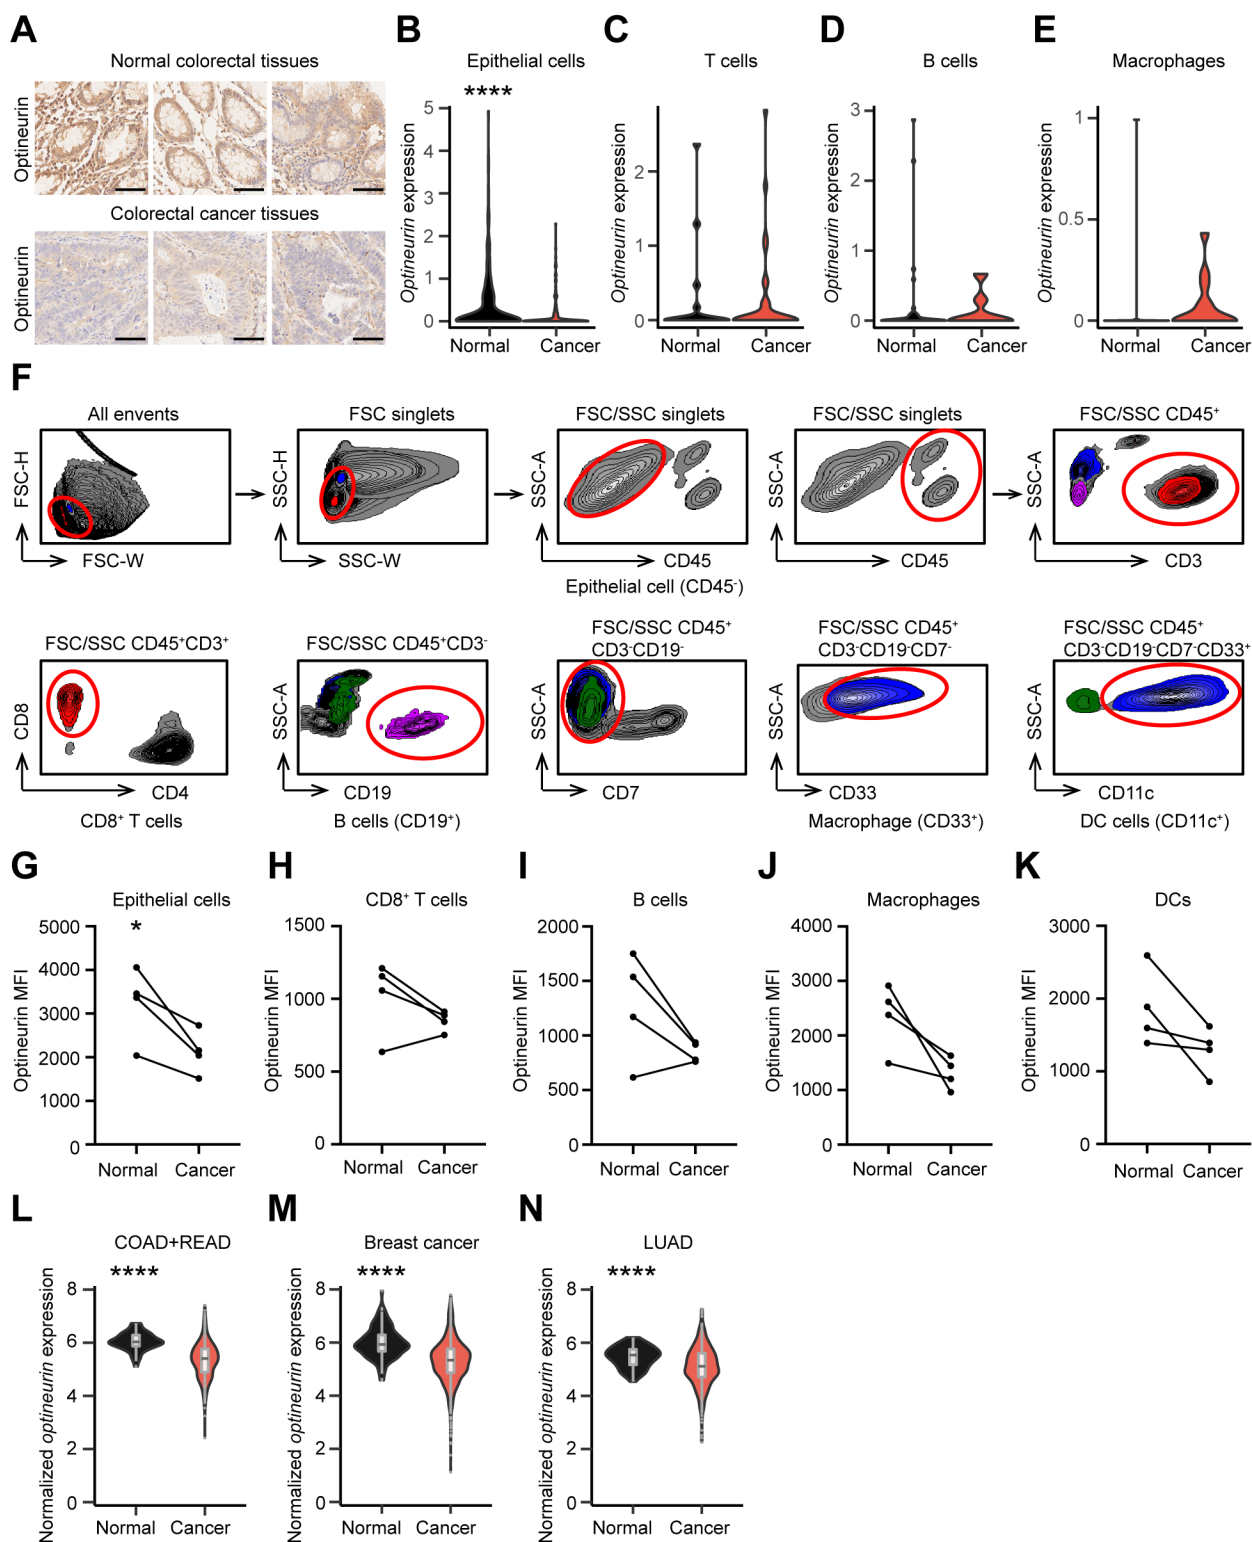

**Supplementary Figure S1. Optineurin expression in normal and cancer tissues**

**A**, Optineurin protein expression in colorectal cancer tissues and paired adjacent normal colorectal tissues. Representative immunohistochemistry staining images showed optineurin expression. (cohort 1) (n = 66). Scale bars, 50  $\mu$ m.

**B - E**, Single cell analysis of *optineurin* transcripts in colorectal cancer tissues and adjacent normal colorectal tissues. *Optineurin* expression was determined in (**B**) epithelial cells, (**C**) T cells ( $P = 0.95$ ), (**D**) B cells ( $P = 0.95$ ), and (**E**) macrophages ( $P = 0.15$ ).  $n = 11$ . Two tailed t-tests, \*\*\*\* $P < 0.0001$

**F - K**, *Optineurin* protein expression in colorectal cancer tissues and adjacent normal colorectal tissues. (**F**), Flow cytometry gating strategy determining different cell subsets in the human colorectal tissues. *Optineurin* protein expression was determined by flow cytometry analysis in (**G**) epithelial cells, (**H**) CD8<sup>+</sup> T cells ( $P = 0.1925$ ), (**I**) B cells ( $P = 0.135$ ), (**J**) macrophages ( $P = 0.0605$ ), and (**K**) dendritic cells (DCs) ( $P = 0.1029$ ).  $n = 4$ . Paired t-tests, \* $P < 0.05$ .

**L - N**, *Optineurin* transcripts in different normal tissues and cancer tissues. *Optineurin* transcripts were quantified in (**L**) normal colorectal tissues ( $n = 51$ ), colorectal cancer (COAD+ READ) tissues ( $n = 380$ ), (**M**) normal breast tissues ( $n = 113$ ), breast cancer tissues ( $n = 1098$ ), (**N**) normal lung tissues ( $n = 59$ ), and lung cancer (LUAD) tissues ( $n = 515$ ) in TCGA data set. Two tailed t-tests, \*\*\*\* $P < 0.0001$

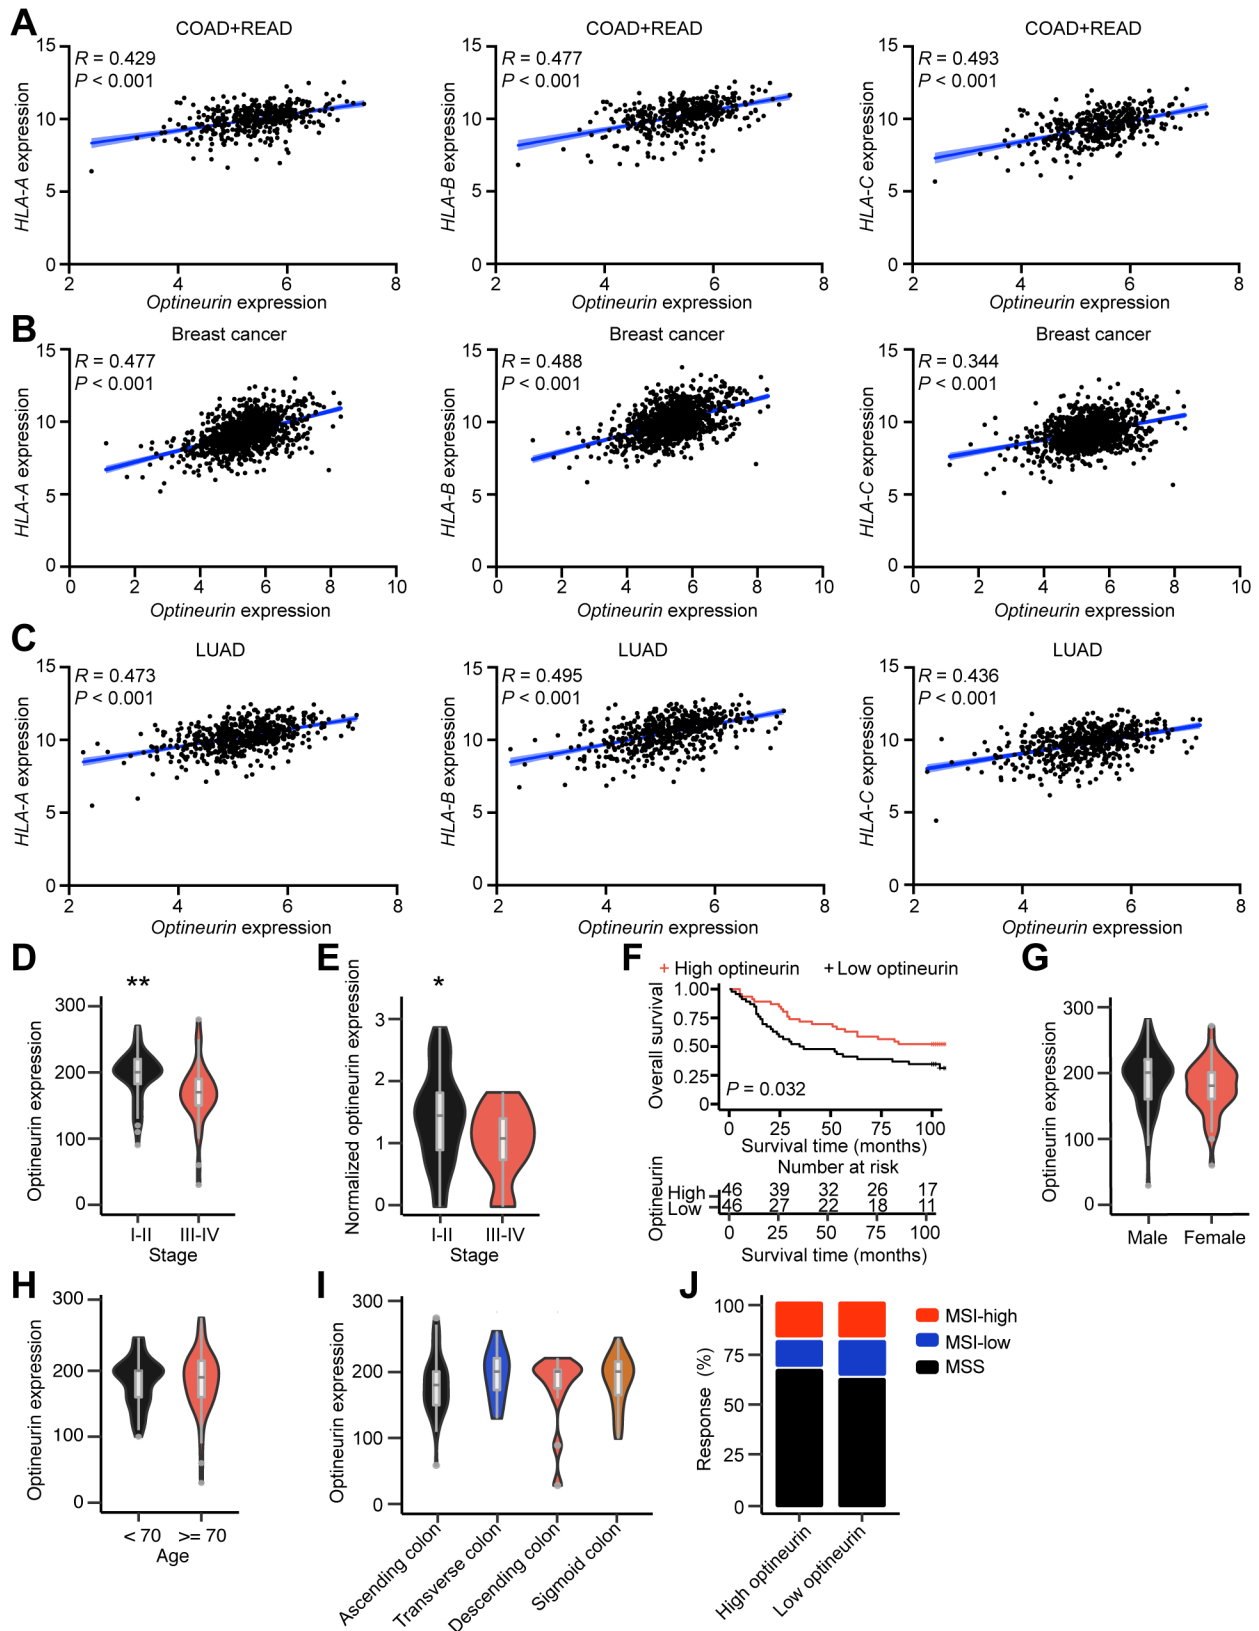

## Supplementary Figure S2. Tumor optineurin correlates with patients' immune and clinicopathological features

**A - C**, Correlation analysis of optineurin and MHC-I (HLA-A, HLA-B, and HLA-C) expression in different cancers. Correlation of *optineurin* expression with *HLA-A*, *HLA-B*, and *HLA-C* in **(A)** colorectal cancer (COAD+READ) tissues ( $n = 431$ ), **(B)** breast cancer tissues ( $n = 1211$ ), and **(C)** lung cancer (LUAD) tissues ( $n = 574$ ) in TCGA data set.

**D** and **E**, Optineurin expression in different TNM stages in colorectal cancer tissues. (**D**), Optineurin expression detected by immunohistochemistry staining in different TNM stages of colorectal cancer (n = 92). Two tailed t-tests,  $**P < 0.01$ . (**E**), Proteomic analysis of optineurin expression in different TNM stages of colorectal cancer (n = 90). Two tailed t-tests,  $*P < 0.05$ .

**F**, Survival comparison between patients with low (n = 46) and high (n = 46) levels of optineurin in patients with colorectal cancer in cohort 1 (n = 92), Log-rank test.

**G - I**, Correlation of optineurin expression with patient gender (**G**) ( $P = 0.1577$ ), age (**H**) ( $P = 0.8262$ ) (Two tailed t-tests), and tumor location (**I**) ( $P = 0.3486$ ) (Spearman's rank correlation).

**J**, Relationship between optineurin protein expression and MSI status. The MSI status is shown in colon cancer patients with high and low optineurin expression (median). Chi-square test,  $P = 0.863$ .

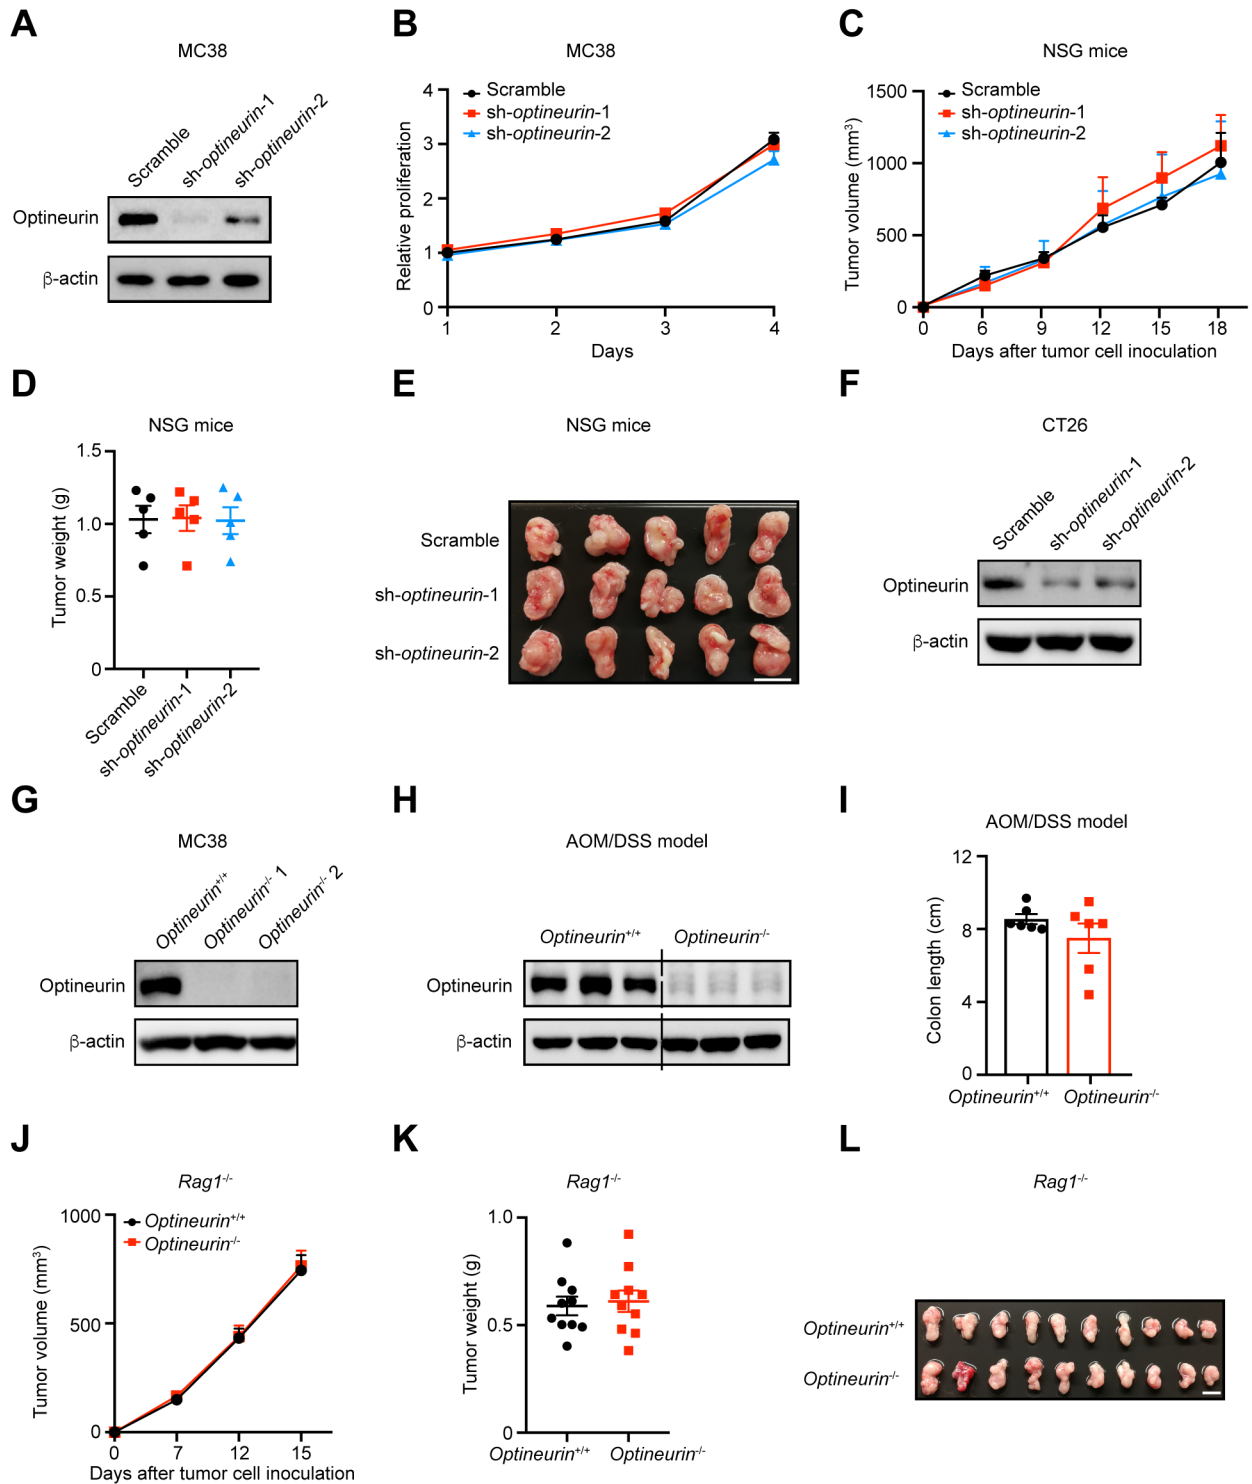

### Supplementary Figure S3. Effect of optineurin deficiency on tumor growth

**A**, Efficacy of sh-*optineurin* on tumor optineurin expression. Immunoblots analysis revealed optineurin expression in sh-*optineurin* (sh-*optineurin*-1 and sh-*optineurin*-2) and scrambled shRNA expressing MC38 tumor cells. One of 3 repeats is shown.

**B**, Effect of optineurin expression on MC38 cell proliferation. sh-*optineurin* and scrambled shRNA expressing MC38 cell proliferation was detected with Alamar Blue reagents. Values are means  $\pm$  SD.  $n = 3$  independent experiments. Two-way ANOVA, scrambled shRNA vs. sh-*optineurin*-1,  $P > 0.05$ ; scrambled shRNA vs. sh-*optineurin*-2,  $P > 0.05$ .

**C - E**, Effect of optineurin expression on MC38 tumor growth in NSG mice. sh-*optineurin* and scrambled shRNA expressing MC38 tumor cells were inoculated into NSG mice. Tumor volume (**C**), tumor weight (**D**), and tumor images (**E**) are shown. Mean  $\pm$  SEM, n = 5 /group. Two-way ANOVA, scrambled shRNA vs. sh-*optineurin-1*,  $P > 0.05$ ; scrambled shRNA vs. sh-*optineurin-2*,  $P > 0.05$  (**C**). Two tailed t test, shRNA vs. sh-*optineurin-1*,  $P > 0.05$ ; scrambled shRNA vs. sh-*optineurin-2*,  $P > 0.05$  (**D**). Scale bars, 1 cm (**E**).

**F**, Efficacy of sh-*optineurin* on tumor optineurin expression. Immunoblots showed optineurin expression in sh-*optineurin* (sh-*optineurin-1* and sh-*optineurin-2*) and scrambled shRNA expressing CT26 tumor cells. One of 3 repeats is shown.

**G**, Efficacy of **optineurin** knock out on tumor optineurin expression. Immunoblots showed optineurin expression in 2 *optineurin*<sup>-/-</sup> MC38 clones and *optineurin*<sup>+/+</sup> (wild type) MC38 tumor cells. One of 3 repeats is shown.

**H and I**, Effect of IEC-**optineurin** knock-out on colorectal tumorigenesis in AOM/DSS model. (**H**) Immunoblots showed optineurin expression in IEC of *optineurin*<sup>+/+</sup> or *optineurin*<sup>-/-</sup> mice. 3 mice /group. (**I**) Colorectal length of *optineurin*<sup>+/+</sup> or *optineurin*<sup>-/-</sup> mice is shown. 6 mice /group. Two tailed t test,  $P > 0.05$ .

**J - L**, Effect of optineurin expression on MC38 tumor growth in *Rag1*<sup>-/-</sup> mice. *Optineurin*<sup>-/-</sup> and *optineurin*<sup>+/+</sup> MC38 tumor cells were inoculated into *Rag1*<sup>-/-</sup> mice. Tumor volume (**J**), tumor weight (**K**), and tumor images (**L**) are shown. Two-way ANOVA, *optineurin*<sup>+/+</sup> vs *optineurin*<sup>-/-</sup>,  $P > 0.05$  (**J**). Two tailed t test,  $P > 0.05$  (**K**).

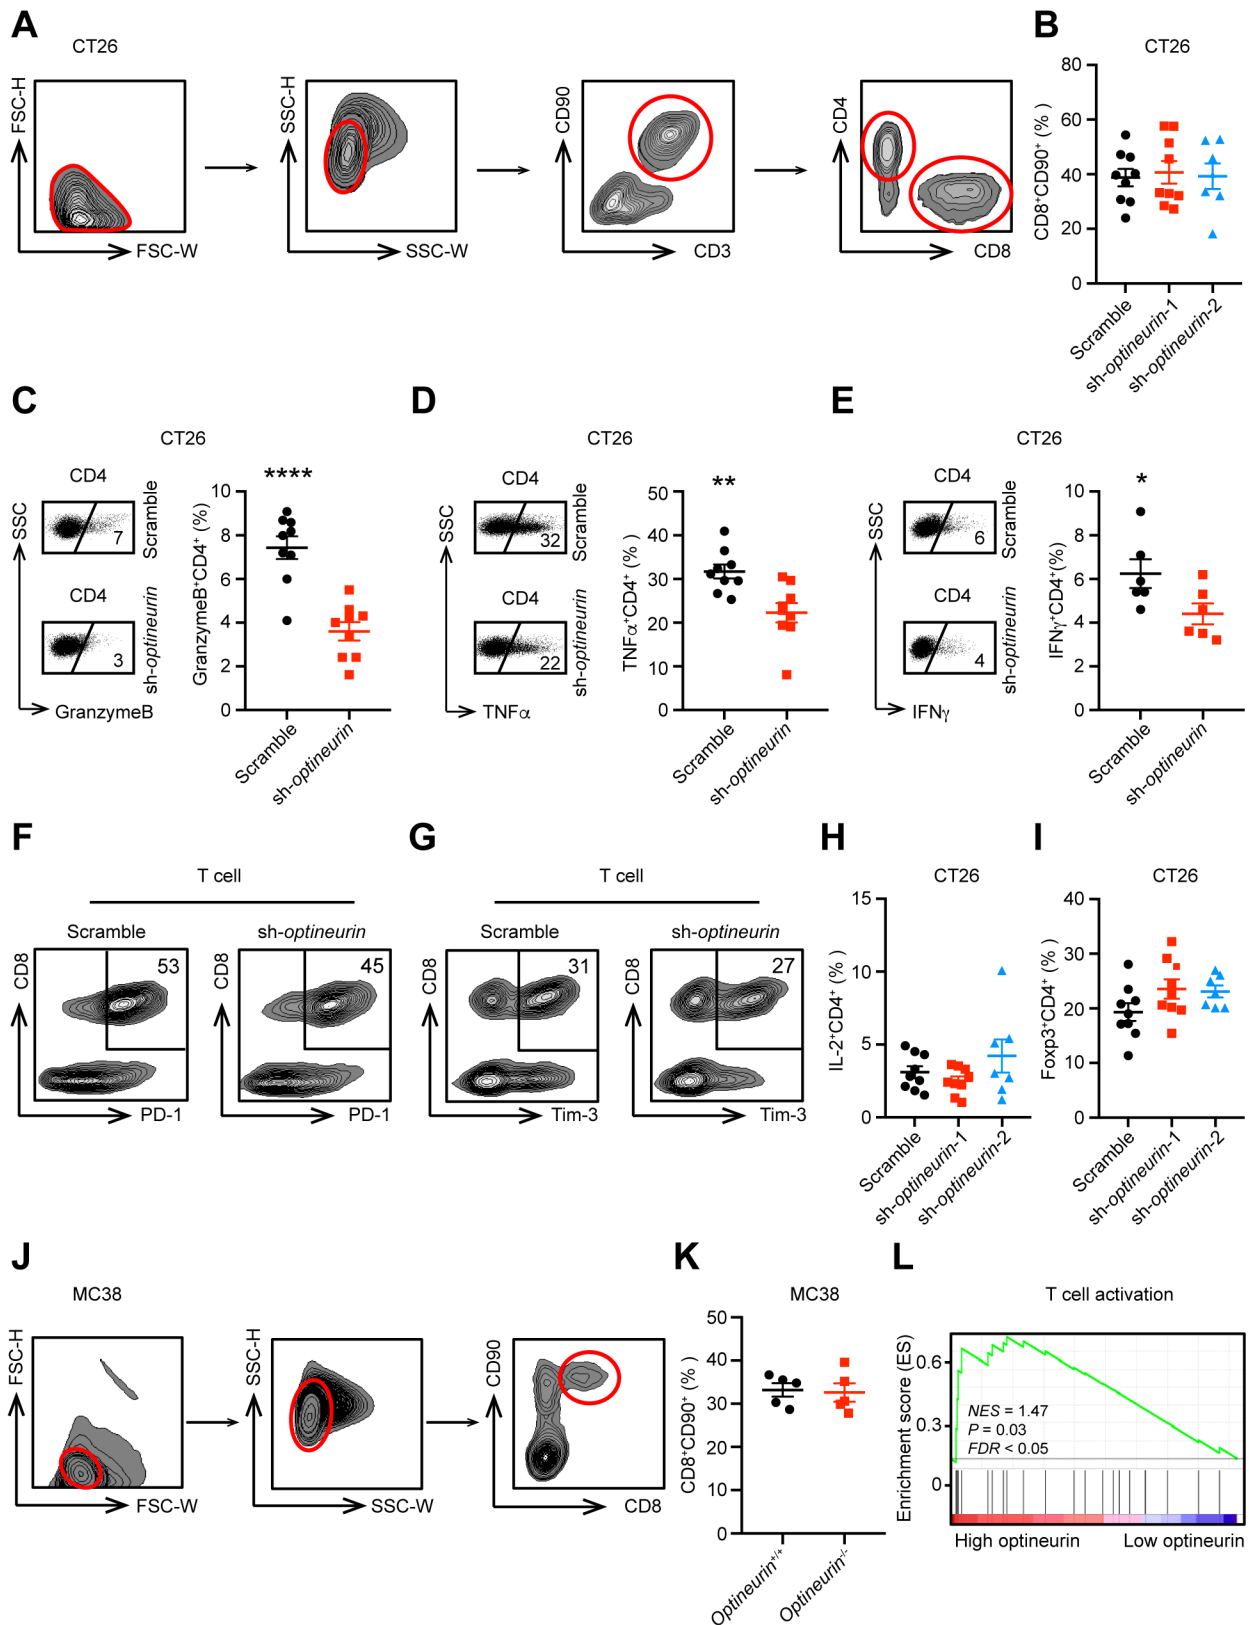

**Supplementary Figure S4. Optineurin impacts cytotoxic T cell activation and function *in vivo***

**A - I**, Effect of tumor **optineurin** knocking down on tumor infiltrating T cells. sh-*optineurin* and scrambled shRNA expressing CT26 cells were inoculated into BALB/c mice. **(A)**, Flow cytometry gating strategy determining different cell subsets in CT26 model. The percentages of tumor infiltrating CD8<sup>+</sup> cells **(B)**, granzyme B<sup>+</sup>CD4<sup>+</sup> T cells **(C)**, TNF $\alpha$ <sup>+</sup>CD4<sup>+</sup> T cells **(D)**, IFN $\gamma$ <sup>+</sup>CD4<sup>+</sup> T cells

(E), PD-1<sup>+</sup>CD8<sup>+</sup> T cells (F), Tim-3<sup>+</sup>CD8<sup>+</sup> T cells (G), IL-2<sup>+</sup>CD4<sup>+</sup> cells (H), and Foxp3<sup>+</sup>CD4<sup>+</sup> T cells (I) were analyzed by flow cytometry. Mean ± SEM, n = 7-9 /group. Scrambled shRNA vs. sh-*optineurin*, Two tailed t-tests, \*\*\*\* $P < 0.0001$ , \*\* $P < 0.001$ , \* $P < 0.001$ .

**J and K**, Effect of tumor optineurin deficiency on MC38 tumor infiltrating T cell levels. *Optineurin*<sup>+/+</sup> and *optineurin*<sup>-/-</sup> expressing MC38 cells were inoculated into C57/BL6 mice. (J), Flow cytometry gating strategy determining different cell subsets in MC38 model. (K), The percentage of tumor infiltrating CD8<sup>+</sup> T cells was analyzed by flow cytometry. Mean ± SEM, n = 5 /group. Two tailed t-tests.  $P > 0.05$ .

**L**, Correlation between optineurin protein expression and T cell activation signature in melanoma patients treated with anti-PD-1 therapy (n = 67).



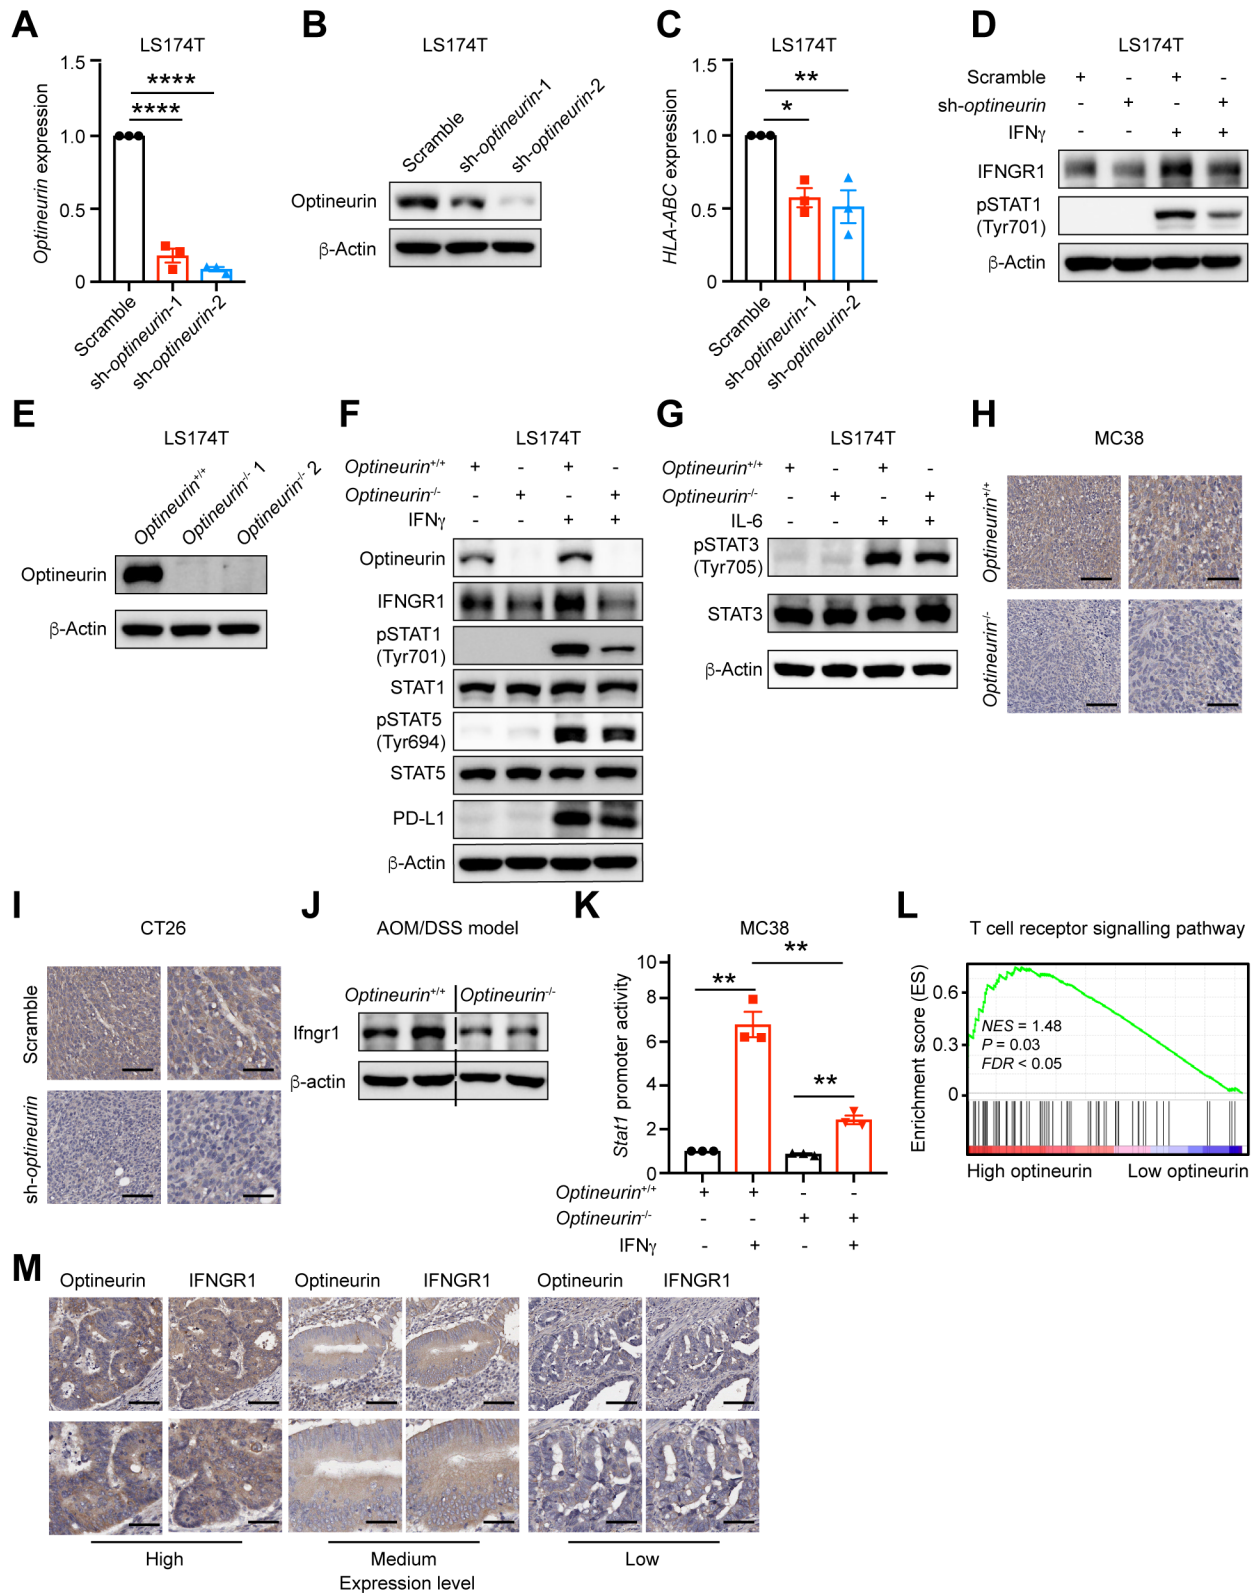

### Supplementary Figure S5. Optineurin deficiency impairs IFNGR1 expression and antigen presentation

**A** and **B**, **Optineurin** knocking down efficiency in LS174T cells. **(A)** **Optineurin** was quantified by qRT-PCR in scramble and sh-*optineurin* expressing LS174T cells.  $n = 3$ , mean  $\pm$  SEM. Two tailed t-tests, \*\*\*\* $P < 0.0001$ . **(B)** Immunoblots analysis revealed optineurin expression in sh-*optineurin* (sh-*optineurin*-1 and sh-*optineurin*-2) and scrambled shRNA expressing LS174T cells. One of 3 repeats is shown.

**C**, Effect of sh-*optineurin* on *HLA-ABC* expression in LS174T cells. *HLA-ABC* was quantified by qRT-PCR in scramble and sh-*optineurin* expressing LS174T cells. n = 3, mean ± SEM. Two tailed t-tests, \**P* < 0.05, \*\**P* < 0.01.

**D - F**, Effect of optineurin on the IFN $\gamma$  pathway in LS174T cells. sh-*optineurin* LS174T cells (**D**) and **optineurin** knocked out (*optineurin*<sup>-/-</sup>) LS174T cells (**E** and **F**) were stimulated with IFN $\gamma$  (10 ng/ml) for 4 hours. Relevant proteins were determined by immunoblots. One of 3 repeats is shown.

**G**, Effect of optineurin on STAT3 in LS174T cells. *Optineurin*<sup>+/+</sup> and *optineurin*<sup>-/-</sup> LS174T cells were stimulated with IL-6 (20 ng/ml) for 30 minutes. pSTAT3 and STAT3 were determined by immunoblot. One of 3 repeats is shown.

**H - J**, Effect of optineurin on murine tumor *Ifngr1* *in vivo*. Immunohistochemistry staining showed tumor tissue *Ifngr1* expression in wild type mice bearing *optineurin*<sup>-/-</sup> MC38 (**H**), sh-*optineurin* CT26 (**I**), and control tumors. One of 5 mice/group is shown. Scale bars, (left) 100  $\mu$ m, (right) 50  $\mu$ m (magnified). (**J**) Immunoblots revealed *Ifngr1* expression in *optineurin*<sup>+/+</sup> or *optineurin*<sup>-/-</sup> tumors in AOM/DSS murine model.

**K**, Effect of optineurin on *Stat1* promoter activity in MC38 tumor cells. *Stat1* reporter expressing *optineurin*<sup>+/+</sup> and *optineurin*<sup>-/-</sup> MC38 cells were stimulated with IFN $\gamma$  for 4 hours. *Stat1* promoter activity is expressed as relative Renilla luciferase activity, normalized to unstimulated cells. n = 3, two tailed t-tests, \*\**P* < 0.01.

**L**, Correlation between optineurin protein expression and T cell receptor signaling signature in melanoma patients. T cell receptor signaling is enriched in high optineurin expression melanoma patients with anti-PD1 therapy (n = 67).

**M**, Correlation of optineurin expression with IFNGR1 expression in human colorectal cancer. Representative immunohistochemistry staining images showed high to low expression of optineurin and IFNGR1 expression in colorectal cancer tissues. Cohort 3, n = 78. Scale bars, (upper panels) 100  $\mu$ m, (lower panels) 50  $\mu$ m (magnified).

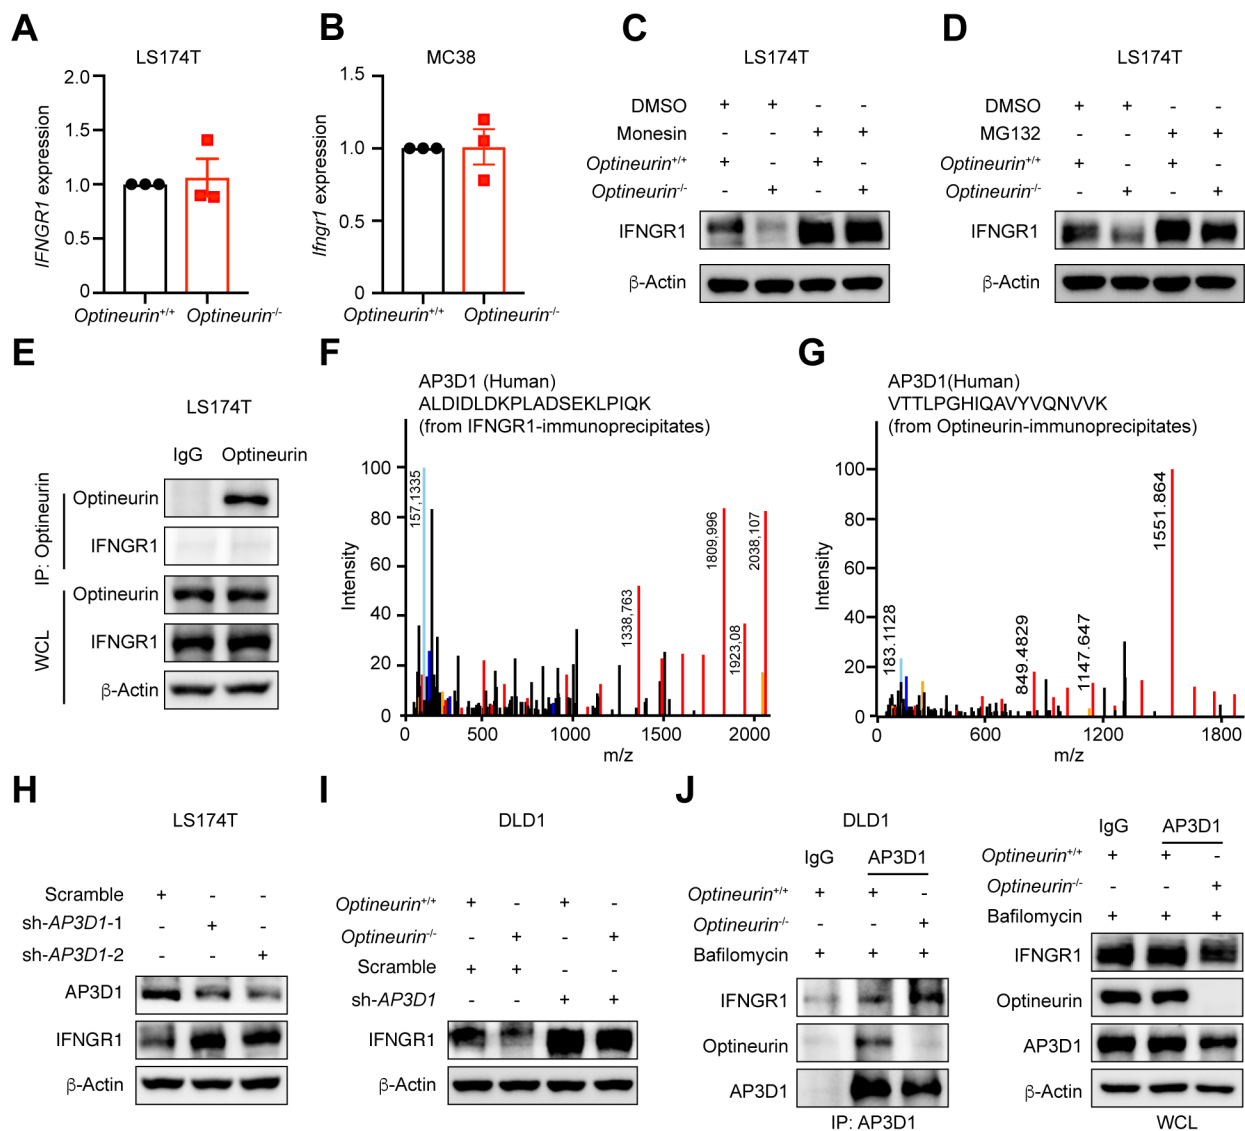

### Supplementary Figure S6. Loss of optineurin promotes IFNGR1 lysosomal sorting via AP3D1

**A and B**, Effects of optineurin on *IFNGR1* transcripts. *IFNGR1* transcripts were quantified by qPCR in *optineurin*<sup>+/+</sup> and *optineurin*<sup>-/-</sup> LS174T cells (**A**) and MC38 cells (**B**), mean  $\pm$  SEM, n = 3 biological replicates.

**C**, Effects of monensin on IFNGR1 expression. *Optineurin*<sup>+/+</sup> and *optineurin*<sup>-/-</sup> LS174T cells were treated with or without monensin for 4 hours. Immunoblots showed IFNGR1 expression. n = 3 biological replicates.

**D**, Effects of MG132 on IFNGR1 expression. *Optineurin*<sup>+/+</sup> and *optineurin*<sup>-/-</sup> LS174T cells were treated with or without MG132 for 4 hours. Immunoblots showed IFNGR1 expression. n = 3 biological replicates.

**E**, Detection of optineurin and IFNGR1 interaction. Proteins in LS174T cells were immunoprecipitated using anti-optineurin antibody and immunoblotted using anti-IFNGR1. WCL, whole-cell lysate. n = 3 biological replicates.

**F** and **G**, Representative spectrum of IP-MS. (**F**) Representative spectrum of unique peptides of AP3D1 in IFNGR1-immunoprecipitates. (**G**) Representative spectrum of unique peptides of AP3D1 in optineurin -immunoprecipitates.

**H** and **I**, Effect of sh-*AP3D1* on IFNGR1 expression. (**H**) Immunoblots showed AP3D1 and IFNGR1 expression in sh-*AP3D1* (sh-*AP3D1*-1 and sh-*AP3D1*-2) and scrambled shRNA expressing LS174T cells. One of 3 repeats is shown. (**I**) IFNGR1 expression in sh-*AP3D1* and scrambled shRNA expressing *optineurin*<sup>+/+</sup> and *optineurin*<sup>-/-</sup> LS174T cells. Immunoblots showed IFNGR1 expression. n = 3 biological replicates.

**J**, Effect of optineurin expression on the interaction between IFNGR1 and AP3D1. Detection of endogenous IFNGR1 and AP3D1 interaction by Co-IP. Proteins in *optineurin*<sup>+/+</sup> and *optineurin*<sup>-/-</sup> DLD1 cells were immunoprecipitated using anti-AP3D1 antibody and immunoblotted using anti-IFNGR1. Cells were treated with Bafilomycin for 4 hours. WCL, whole-cell lysate. n = 3 biological replicates.

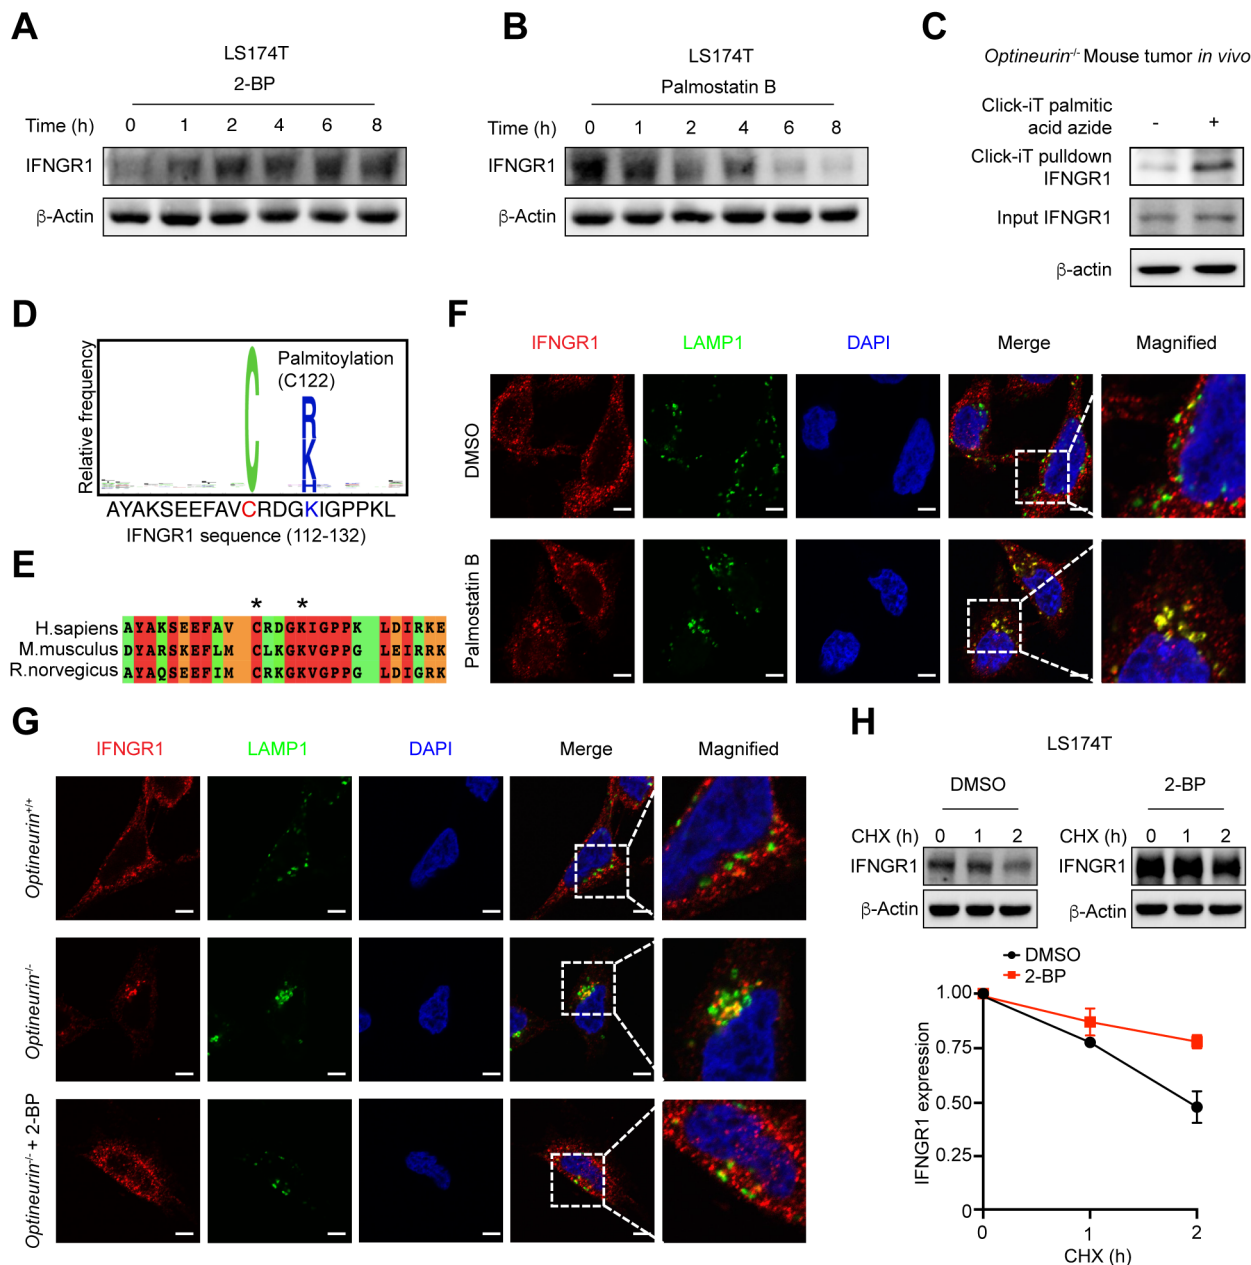

### Supplementary Figure S7. IFNGR1 palmitoylation affects IFNGR1 lysosome degradation

**A** and **B**, Effect of 2-BP (**A**) and Palmostatin B (**B**) on IFNGR1 protein expression in LS174T cells. LS174T cells were treated with 2-BP (**A**) or Palmostatin B (**B**) for different time points. Immunoblots showed IFNGR1 protein expression. One of 3 replicates is shown.

**C**, Detection of IFNGR1 palmitoylation in *optineurin*<sup>-/-</sup> tumor cells *in vivo*. IECs were isolated from *optineurin*<sup>-/-</sup> mice in AOM/DSS models. IECs were treated and prepared for the Click-iT reaction. One of 3 repeats is shown.

**D**, Prediction of IFNGR1 palmitoylation at Cys122 by the MDD-Palm.

**E**, Palmitoylation site (Cys122) in different species.

**F**, Effect of Palmostatin B on tumor IFNGR1 lysosomal localization. DLD1 cells were treated with Palmostatin B and stained for IFNGR1 (Red) and LAMP1 (Green). Cell nucleus (Blue) was stained

DAPI. Representative immunofluorescence images showed the co-localization of IFNGR1 and LAMP1. Scale bars, 5  $\mu$ m. n = 3 biological replicates.

**G**, Effect of 2-BP on tumor IFNGR1 lysosomal localization. *Optineurin*<sup>-/-</sup> and *Optineurin*<sup>+/+</sup> DLD1 cells were treated with 2-BP and stained for IFNGR1 (Red) and LAMP1 (Green). Cell nucleus (Blue) was stained DAPI. Representative immunofluorescence images showed the co-localization of IFNGR1 and LAMP1. Scale bars, 5  $\mu$ m. n = 3 biological replicates.

**H**, Effect of palmitoylation on IFNGR1 stability. LS174T cells were treated with 2-BP in the presence of CHX. Immunoblots showed IFNGR1 protein expression bands (above) and intensities (bottom) at different time points. One of 3 replicates is shown.

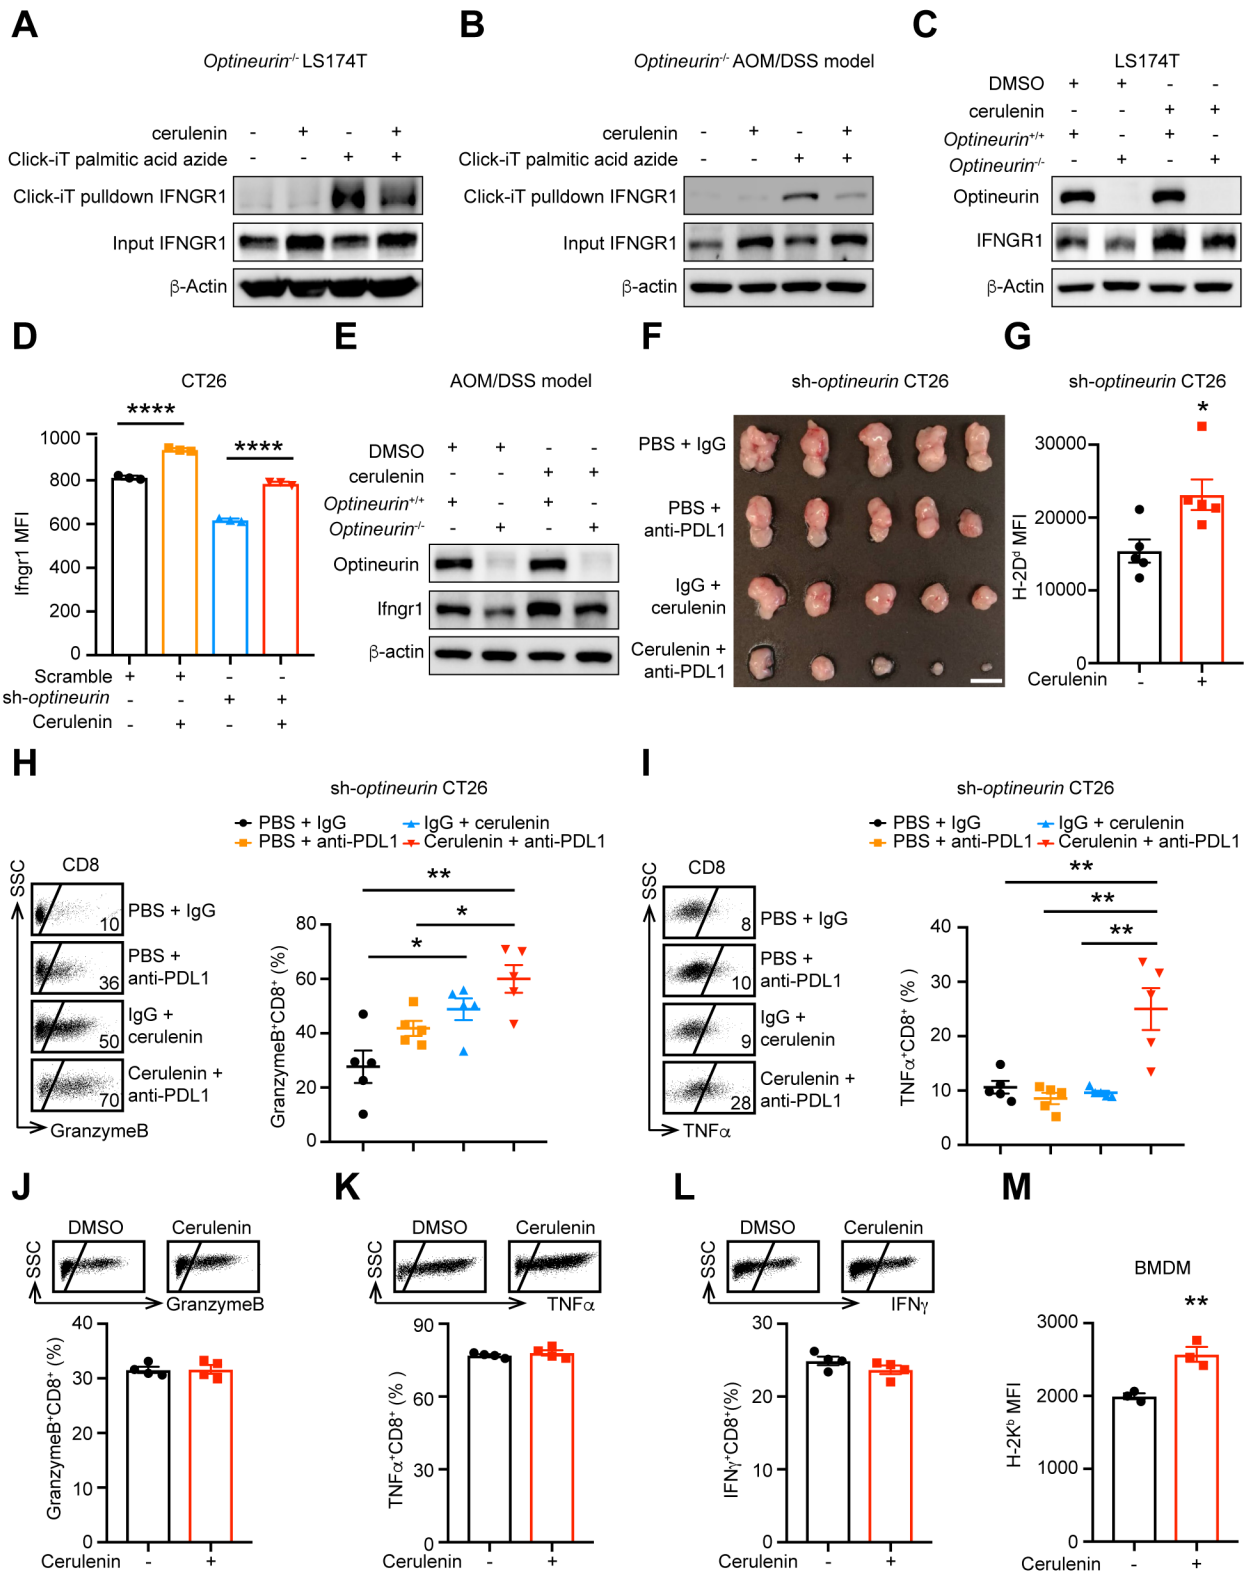

### Supplementary Figure S8. Targeting IFNGR1 palmitoylation enhances immunotherapy efficacy

**A and B**, Effect of cerulenin on IFNGR1 palmitoylation. *Optineurin*<sup>-/-</sup> LS174T cells (**A**) and *optineurin*<sup>-/-</sup> IECs isolated from AOM/DSS murine models (**B**) were treated with cerulenin for 6 hours and prepared for the Click-iT reaction. One of 3 repeats is shown.

**C - E**, Effect of cerulenin on IFNGR1 expression. *Optineurin*<sup>+/+</sup> and *optineurin*<sup>-/-</sup> LS174T cells (**C**), scramble and sh-*optineurin* expressing CT26 cells (**D**), and *optineurin*<sup>+/+</sup> and *optineurin*<sup>-/-</sup> IECs

isolated from AOM/DSS murine models (**E**) were treated with cerulenin for 4 hours. IFNGR1 expression was detected by immunoblots (**C** and **E**) or flow cytometry (**D**). One of 3 repeats is shown.

**F**, Effect of cerulenin or combination with anti-PD-L1 therapy on sh-*optineurin* CT26 tumor progression. Tumor images are shown. Scale bars, 1 cm.

**G**, Effect of cerulenin on H2D<sup>d</sup> expression in sh-*optineurin* CT26 tumor. The expression of H-2D<sup>d</sup> was analyzed by flow cytometry. Results are shown as mean fluorescence intensity (MFI). Mean ± SEM, n = 5 /group. Two tailed t-tests. \**P* < 0.05.

**H** and **I**, Effect of cerulenin or combination with anti-PD-L1 therapy on sh-*optineurin* CT26 tumor infiltrating T cell function. Sh-*optineurin* CT26 cells were inoculated into BALB/c mice. Mice bearing Sh-*optineurin* CT26 tumor were treated with cerulenin, anti-PD-L1, or their combination. The percentages of tumor infiltrating granzyme B<sup>+</sup> (**H**) and TNFα<sup>+</sup> (**I**) CD8<sup>+</sup> T cells were analyzed by flow cytometry. Mean ± SEM, n = 5 /group. Two tailed t-tests, \* *P* < 0.05, \*\* *P* < 0.01.

**J - L**, Effect of cerulenin on CD8<sup>+</sup> T cells. Splenocytes were stimulated with CD3 (2 μg/ml) and CD28 (1 μg/ml) for 3 days then treated with cerulenin (10 μM) for 4 hours. The percentages of granzyme B<sup>+</sup>CD8<sup>+</sup> T cells (**J**), TNFα<sup>+</sup>CD8<sup>+</sup> T cells (**K**), IFNγ<sup>+</sup>CD8<sup>+</sup> T cells (**L**) were analyzed by flow cytometry. Mean ± SEM, Two tailed t-tests, *P* > 0.05.

**M**, Effect of cerulenin on bone marrow derived macrophages. Bone marrow derived macrophages were treated with cerulenin (10 μM) for 4 hours. H2K<sup>b</sup> protein expression was determined by flow cytometry analysis. Results are shown as the mean fluorescence intensity (MFI) ± SEM. n = 3, Two tailed t-tests, \*\**P* < 0.01

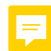



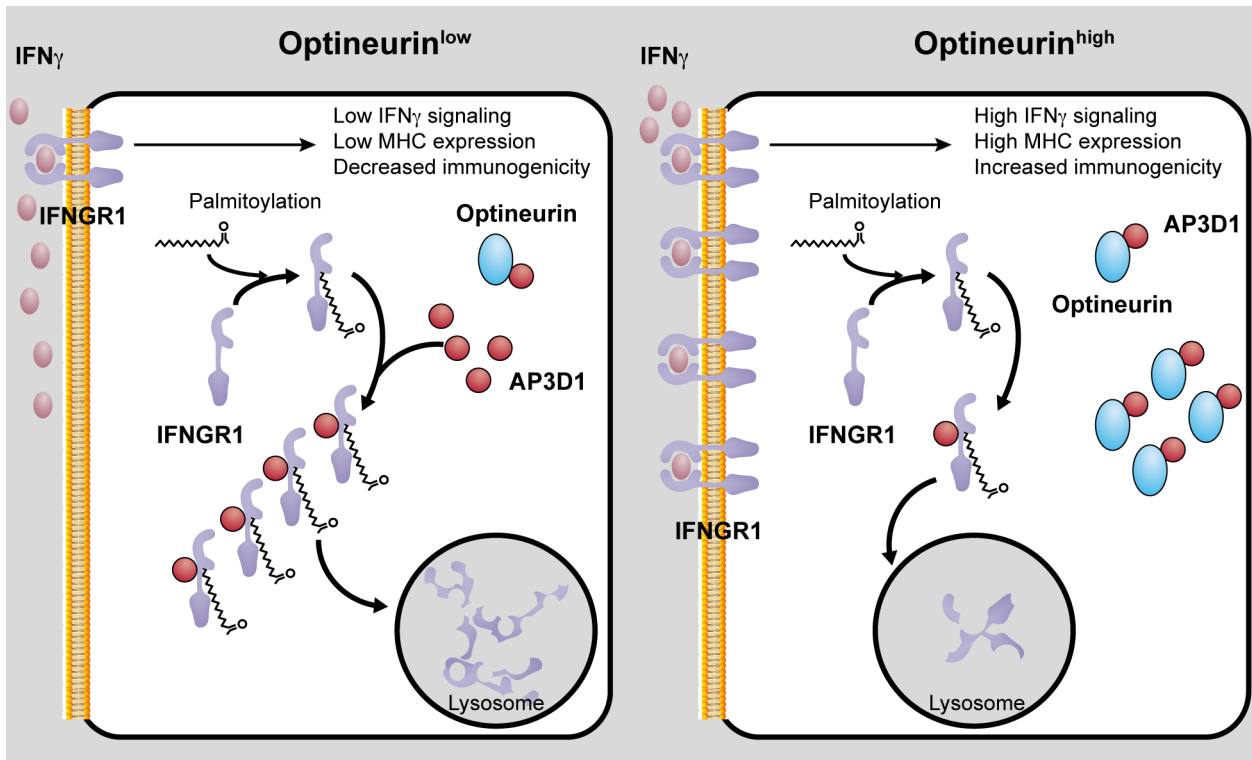

**Supplementary Figure S9. Graphical model**

AP3D1 interacts with and sorts palmitoylated-IFNGR1 to lysosome for degradation. Optineurin binds to AP3D1 to prevent palmitoylated-IFNGR1 lysosomal sorting and degradation. Loss of optineurin results in accelerated AP3D1-directed IFNGR1 lysosomal sorting and degradation, thereby impairing both IFN $\gamma$ - and MHC-I-signaling integrity, abolishing tumor immunity, and endowing intrinsic immune resistance.

## Supplementary Tables

**Supplementary Table S1. Optineurin expression in paired colon cancer and adjacent normal colon tissues**

| Adjacent normal tissues | Adjacent optineurin | Cancer  | Cancer optineurin |
|-------------------------|---------------------|---------|-------------------|
| 01CO005N                | 0.125               | 01CO005 | -0.105            |
| 01CO006N                | 0.323               | 01CO006 | -0.219            |
| 01CO008N                | 0.292               | 01CO008 | -0.0643           |
| 01CO013N                | 0.0737              | 01CO013 | -0.734            |
| 01CO014N                | 0.252               | 01CO014 | -0.415            |
| 01CO015N                | 0.179               | 01CO015 | -0.422            |
| 01CO019N                | 0.244               | 01CO019 | -0.365            |
| 01CO022N                | 0.143               | 01CO022 | -0.314            |
| 05CO002N                | 0.442               | 05CO002 | -0.0639           |
| 05CO003N                | 0.149               | 05CO003 | -0.499            |
| 05CO006N                | 0.225               | 05CO006 | -0.0025           |
| 05CO011N                | 0.402               | 05CO011 | -0.0486           |
| 05CO015N                | 0.101               | 05CO015 | 0.22              |
| 05CO020N                | 0.255               | 05CO020 | -0.38             |
| 05CO026N                | 0.0189              | 05CO026 | -0.269            |
| 05CO028N                | 0.493               | 05CO028 | -0.49             |
| 05CO029N                | 0.29                | 05CO029 | -0.0018           |
| 05CO032N                | 0.199               | 05CO032 | 0.0515            |
| 05CO033N                | 0.171               | 05CO033 | 0.268             |
| 05CO034N                | -0.0371             | 05CO034 | -0.106            |
| 05CO035N                | 0.306               | 05CO035 | 0.128             |
| 05CO037N                | 0.266               | 05CO037 | -0.324            |
| 05CO039N                | 0.399               | 05CO039 | -0.0082           |
| 05CO041N                | 0.32                | 05CO041 | 0.123             |
| 05CO044N                | 0.108               | 05CO044 | -0.584            |
| 05CO045N                | 0.237               | 05CO045 | 0.0137            |
| 05CO047N                | 0.256               | 05CO047 | -0.0713           |
| 05CO048N                | 0.135               | 05CO048 | -0.486            |
| 05CO049N                | -0.0817             | 05CO049 | -0.376            |
| 05CO050N                | 0.274               | 05CO050 | -0.743            |
| 05CO053N                | 0.294               | 05CO053 | -0.462            |
| 05CO054N                | 0.213               | 05CO054 | -0.279            |
| 06CO001N                | 0.421               | 06CO001 | -0.226            |
| 06CO002N                | 0.495               | 06CO002 | 0.252             |
| 09CO005N                | 0.0783              | 09CO005 | -0.117            |
| 09CO006N                | 0.315               | 09CO006 | -0.241            |
| 09CO008N                | 0.409               | 09CO008 | -0.326            |
| 09CO011N                | 0.0149              | 09CO011 | 0.0364            |
| 09CO013N                | 0.184               | 09CO013 | -0.303            |

|          |         |         |         |
|----------|---------|---------|---------|
| 09CO014N | -0.0156 | 09CO014 | -0.249  |
| 09CO015N | 0.0501  | 09CO015 | -0.154  |
| 09CO018N | 0.21    | 09CO018 | -0.269  |
| 09CO019N | -0.038  | 09CO019 | 0.337   |
| 09CO022N | -0.0683 | 09CO022 | -0.545  |
| 11CO005N | 0.511   | 11CO005 | 0.285   |
| 11CO007N | 0.144   | 11CO007 | 0.0828  |
| 11CO008N | 0.257   | 11CO008 | 0.254   |
| 11CO010N | 0.392   | 11CO010 | -0.198  |
| 11CO018N | 0.312   | 11CO018 | 0.0658  |
| 11CO019N | 0.0364  | 11CO019 | -0.0316 |
| 11CO020N | 0.268   | 11CO020 | -0.251  |
| 11CO021N | 0.493   | 11CO021 | 0.267   |
| 11CO022N | -0.0158 | 11CO022 | 0.0531  |
| 11CO027N | 0.501   | 11CO027 | 0.156   |
| 11CO030N | 0.575   | 11CO030 | 0.151   |
| 11CO031N | 0.322   | 11CO031 | 0.179   |
| 11CO032N | 0.449   | 11CO032 | 0.673   |
| 11CO033N | 0.254   | 11CO033 | 0.294   |
| 11CO036N | 0.381   | 11CO036 | 0.109   |
| 11CO037N | 0.398   | 11CO037 | 0.241   |
| 11CO039N | 0.421   | 11CO039 | -0.435  |
| 11CO042N | 0.0836  | 11CO042 | -0.0686 |
| 11CO043N | 0.276   | 11CO043 | 0.193   |
| 11CO044N | 0.301   | 11CO044 | -0.0138 |
| 11CO045N | 0.135   | 11CO045 | -0.023  |
| 11CO047N | 0.196   | 11CO047 | -0.164  |
| 11CO048N | 0.0724  | 11CO048 | 0.137   |
| 11CO051N | 0.0823  | 11CO051 | 0.105   |
| 11CO052N | 0.232   | 11CO052 | 0.268   |
| 11CO053N | 0.154   | 11CO053 | 0.173   |
| 11CO054N | 0.185   | 11CO054 | -0.403  |
| 11CO057N | 0.322   | 11CO057 | -0.0179 |
| 11CO058N | 0.0375  | 11CO058 | -0.0038 |
| 11CO061N | 0.22    | 11CO061 | -0.0493 |
| 11CO062N | 0.553   | 11CO062 | 0.109   |
| 11CO070N | 0.455   | 11CO070 | -0.157  |
| 11CO072N | 0.337   | 11CO072 | 0.56    |
| 11CO077N | 0.195   | 11CO077 | 0.0617  |
| 11CO079N | 0.111   | 11CO079 | 0.126   |
| 14CO005N | 0.441   | 14CO005 | -0.0507 |
| 15CO001N | 0.301   | 15CO001 | -0.269  |
| 15CO002N | 0.199   | 15CO002 | -0.282  |
| 16CO002N | 0.315   | 16CO002 | -0.54   |
| 16CO003N | 0.354   | 16CO003 | 0.394   |
| 16CO006N | 0.196   | 16CO006 | -0.0339 |

|          |        |         |        |
|----------|--------|---------|--------|
| 16CO011N | 0.367  | 16CO011 | -0.409 |
| 20CO001N | 0.218  | 20CO001 | 0.196  |
| 20CO003N | -0.173 | 20CO003 | 0.287  |
| 20CO004N | 0.225  | 20CO004 | -0.564 |
| 20CO006N | 0.119  | 20CO006 | -0.125 |
| 20CO007N | 0.356  | 20CO007 | -0.317 |
| 21CO006N | 0.245  | 21CO006 | 0.0905 |
| 21CO007N | 0.579  | 21CO007 | -0.43  |
| 22CO004N | 0.0143 | 22CO004 | -0.125 |
| 22CO006N | 0.439  | 22CO006 | 0.63   |
| 27CO004N | 0.379  | 27CO004 | -0.45  |

---

**Supplementary Table S2. Expression of optineurin and patient outcome (cohort 1)**

|                           | <b>Overall<br/>(Percentage)</b> | <b>HR (95% CI)</b>  | <b>P</b> |
|---------------------------|---------------------------------|---------------------|----------|
| <b>Age</b>                |                                 |                     |          |
| < 70                      | 46.00                           | 2.09 (1.22 – 3.60)  | 0.007    |
| >= 70                     | 54.00                           |                     |          |
| <b>Gender</b>             |                                 |                     |          |
| Male                      | 56.00                           | 0.96 (0.57-1.61)    | 0.883    |
| Female                    | 44.00                           |                     |          |
| <b>Stage</b>              |                                 |                     |          |
| I - II                    | 61.00                           | 2.62 (1.56 -4.40)   | < 0.001  |
| III - IV                  | 39.00                           |                     |          |
| <b>T stage</b>            |                                 |                     |          |
| T1 - T2                   | 6.19                            | 2.43 (0.59 – 9.96)  | 0.218    |
| T3 - T4                   | 93.81                           |                     |          |
| <b>N stage</b>            |                                 |                     |          |
| N0                        | 61.00                           | 2.62 (1.56 – 4.40)  | < 0.001  |
| N1 - N3                   | 39.00                           |                     |          |
| <b>M stage</b>            |                                 |                     |          |
| M0                        | 97.03                           | 15.33 (4.23 -55.62) | < 0.001  |
| M1                        | 2.97                            |                     |          |
| <b>Grade</b>              |                                 |                     |          |
| I - II                    | 75.00                           | 1.58 (0.89-2.79)    | 0.116    |
| III                       | 25.00                           |                     |          |
| <b>Tumor localization</b> |                                 |                     |          |
| Ascending colon           | 45.36                           | 1.14 (0.50-2.59)    | 0.758    |
| Transverse colon          | 10.31                           |                     |          |
| Descending colon          | 13.40                           |                     |          |
| Sigmoid colon             | 30.93                           |                     |          |
| <b>Optineurin</b>         |                                 |                     |          |
| Low (< median)            | 50.00                           | 0.55 (0.32 – 0.95)  | 0.032    |
| High (>= median)          | 50.00                           |                     |          |

**Supplementary Table S3. Expression of optineurin and IFNGR1 and patient outcome (cohort 3)**

|                           | <b>Overall<br/>(Percentage)</b> | <b>HR (95%CI)</b>      | <b>P</b> |
|---------------------------|---------------------------------|------------------------|----------|
| <b>Age</b>                |                                 |                        |          |
| < 70                      | 65.38                           | 1.57 (0.50 - 4.97)     | 0.439    |
| >= 70                     | 34.62                           |                        |          |
| <b>Gender</b>             |                                 |                        |          |
| Male                      | 51.28                           | 1 (0.32 - 3.09)        | 0.994    |
| Female                    | 48.72                           |                        |          |
| <b>Stage</b>              |                                 |                        |          |
| I - II                    | 52.56                           | NA                     | NA       |
| III - IV                  | 47.44                           |                        |          |
| <b>T stage</b>            |                                 |                        |          |
| T1 - T2                   | 36.84                           | 2.88 (0.62 - 13.32)    | 0.177    |
| T3 - T4                   | 63.16                           |                        |          |
| <b>N stage</b>            |                                 |                        |          |
| N0                        | 66.22                           | 1.18 (0.29 - 4.74)     | 0.814    |
| N1 - N3                   | 33.78                           |                        |          |
| <b>M stage</b>            |                                 |                        |          |
| M0                        | 62.82                           | NA                     | NA       |
| M1                        | 37.18                           |                        |          |
| <b>Grade</b>              |                                 |                        |          |
| I - II                    | 98.46                           | 90.16 (5.41 - 1501.35) | 0.002    |
| III                       | 1.54                            |                        |          |
| <b>Tumor localization</b> |                                 |                        |          |
| Colon                     | 57.69                           | 2.37 (0.75 - 7.50)     | 0.143    |
| Rectum                    | 42.31                           |                        |          |
| <b>Optineurin</b>         |                                 |                        |          |
| Low (< median)            | 50.00                           | 0.24 (0.07 - 0.91)     | 0.035    |
| High (>= median)          | 50.00                           |                        |          |
| <b>IFNGR1</b>             |                                 |                        |          |
| Low (< median)            | 50.00                           | 0.24 (0.06 - 0.88)     | 0.032    |
| High (>= median)          | 50.00                           |                        |          |

**Supplementary Table S4. Clinical and pathological characteristics of colorectal cancer patients (cohort 1)**

|                           | Optineurin                    |                                | IFNGR1                        |                                |
|---------------------------|-------------------------------|--------------------------------|-------------------------------|--------------------------------|
|                           | Low<br>(< median)<br>(n = 46) | High<br>(≥ median)<br>(n = 46) | Low<br>(< median)<br>(n = 45) | High<br>(≥ median)<br>(n = 47) |
| <b>Age</b>                |                               |                                |                               |                                |
| < 70                      | 21 (45.7%)                    | 23 (50.0%)                     | 21 (46.7%)                    | 23 (48.9%)                     |
| ≥ 70                      | 25 (54.3%)                    | 22 (47.8%)                     | 23 (51.1%)                    | 24 (51.1%)                     |
| ND                        | 0 (0%)                        | 1 (2.2%)                       | 1 (2.2%)                      | 0 (0%)                         |
| <b>Gender</b>             |                               |                                |                               |                                |
| Male                      | 19 (41.3%)                    | 30 (65.2%)                     | 19 (42.2%)                    | 30 (63.8%)                     |
| Female                    | 26 (56.5%)                    | 16 (34.8%)                     | 25 (55.6%)                    | 17 (36.2%)                     |
| ND                        | 1 (2.2%)                      | 0 (0%)                         | 1 (2.2%)                      | 0 (0%)                         |
| <b>Stage</b>              |                               |                                |                               |                                |
| I - II                    | 15 (32.6%)                    | 39 (84.8%)                     | 24 (53.3%)                    | 30 (63.8%)                     |
| III - IV                  | 30 (65.2%)                    | 7 (15.2%)                      | 21 (46.7%)                    | 16 (34.0%)                     |
| ND                        | 1 (2.2%)                      | 0 (0%)                         | 0 (0%)                        | 1 (2.2%)                       |
| <b>T stage</b>            |                               |                                |                               |                                |
| T1 - T2                   | 3 (6.5%)                      | 3 (6.5%)                       | 4 (8.9%)                      | 2 (4.3%)                       |
| T3 - T4                   | 40 (87.0%)                    | 42 (91.3%)                     | 39 (86.7%)                    | 43 (91.5%)                     |
| ND                        | 3 (6.5%)                      | 1 (2.2%)                       | 2 (4.4%)                      | 2 (4.3%)                       |
| <b>N stage</b>            |                               |                                |                               |                                |
| N0                        | 15 (32.6%)                    | 39 (84.8%)                     | 24 (53.3%)                    | 30 (63.8%)                     |
| N1 – N3                   | 30 (65.2%)                    | 7 (15.2%)                      | 21 (46.7%)                    | 16 (34.0%)                     |
| ND                        | 1 (2.2%)                      | 0 (0%)                         | 0 (0%)                        | 1 (2.1%)                       |
| <b>M stage</b>            |                               |                                |                               |                                |
| M0                        | 43 (93.5%)                    | 46 (100%)                      | 43 (95.6%)                    | 46 (97.9%)                     |
| M1                        | 3 (6.5%)                      | 0 (0%)                         | 2 (4.4%)                      | 1 (2.1%)                       |
| <b>Grade</b>              |                               |                                |                               |                                |
| I - II                    | 29 (63.0%)                    | 40 (87.0%)                     | 29 (64.4%)                    | 40 (85.1%)                     |
| III                       | 17 (37.0%)                    | 6 (13.0%)                      | 16 (35.6%)                    | 7 (14.9%)                      |
| <b>Tumor localization</b> |                               |                                |                               |                                |
| Ascending colon           | 24 (52.2%)                    | 15 (32.6%)                     | 21 (46.7%)                    | 18 (38.3%)                     |
| Transverse colon          | 4 (8.7%)                      | 6 (13.0%)                      | 6 (13.3%)                     | 4 (8.5%)                       |
| Descending colon          | 5 (10.9%)                     | 7 (15.2%)                      | 3 (6.7%)                      | 9 (19.1%)                      |
| Sigmoid colon             | 12 (26.1%)                    | 15 (32.6%)                     | 13 (28.9%)                    | 14 (29.8%)                     |
| ND                        | 1 (2.2%)                      | 3 (6.5%)                       | 2 (4.4%)                      | 2 (4.3%)                       |

ND: No data

**Supplementary Table S5. Clinical and pathological characteristics of colorectal cancer patients (cohort 3)**

|                           | <b>Optineurin</b>                         |                                         | <b>IFNGR1</b>                             |                                         |
|---------------------------|-------------------------------------------|-----------------------------------------|-------------------------------------------|-----------------------------------------|
|                           | <b>Low<br/>(&lt; median)<br/>(n = 39)</b> | <b>High<br/>(≥ median)<br/>(n = 39)</b> | <b>Low<br/>(&lt; median)<br/>(n = 39)</b> | <b>High<br/>(≥ median)<br/>(n = 39)</b> |
| <b>Age</b>                |                                           |                                         |                                           |                                         |
| < 70                      | 27 (69.2%)                                | 24 (61.5%)                              | 26 (66.7%)                                | 25 (64.1%)                              |
| ≥ 70                      | 12 (30.8%)                                | 15 (38.5%)                              | 13 (33.3%)                                | 14 (35.9%)                              |
| <b>Gender</b>             |                                           |                                         |                                           |                                         |
| Male                      | 18 (46.2%)                                | 22 (56.4%)                              | 20 (51.3%)                                | 20 (51.3%)                              |
| Female                    | 21 (53.8%)                                | 17 (43.6%)                              | 19 (48.7%)                                | 19 (48.7%)                              |
| <b>Stage</b>              |                                           |                                         |                                           |                                         |
| I - II                    | 9 (23.1%)                                 | 32 (82.1%)                              | 8 (20.5%)                                 | 33 (84.6%)                              |
| III - IV                  | 30 (76.9%)                                | 7 (17.9%)                               | 31 (79.5%)                                | 6 (15.4%)                               |
| <b>T stage</b>            |                                           |                                         |                                           |                                         |
| T1 - T2                   | 11 (28.2%)                                | 17 (43.6%)                              | 12 (30.8%)                                | 16 (41%)                                |
| T3 - T4                   | 26 (66.7%)                                | 22 (56.4%)                              | 25 (64.1%)                                | 23 (59.0%)                              |
| ND                        | 2 (5.1%)                                  | 0 (0%)                                  | 2 (5.1%)                                  | 0 (0%)                                  |
| <b>N stage</b>            |                                           |                                         |                                           |                                         |
| N0                        | 16 (41.0%)                                | 33 (84.6%)                              | 14 (35.9%)                                | 35 (89.7%)                              |
| N1 - N3                   | 19 (48.7%)                                | 6 (15.4%)                               | 21 (53.8%)                                | 4 (10.3%)                               |
| ND                        | 4 (10.3%)                                 | 0 (0%)                                  | 4 (10.3%)                                 | 0 (0%)                                  |
| <b>M stage</b>            |                                           |                                         |                                           |                                         |
| M0                        | 17 (43.6%)                                | 32 (82.1%)                              | 15 (38.5%)                                | 34 (87.2%)                              |
| M1                        | 22 (56.4%)                                | 7 (17.9%)                               | 24 (61.5%)                                | 5 (12.8%)                               |
| <b>Grade</b>              |                                           |                                         |                                           |                                         |
| I - II                    | 30 (76.9%)                                | 34 (87.2%)                              | 33 (84.6%)                                | 31 (79.5%)                              |
| III                       | 1 (2.6%)                                  | 0 (0%)                                  | 1 (2.6%)                                  | 0 (0%)                                  |
| ND                        | 8 (20.5%)                                 | 5 (12.8%)                               | 5 (12.8%)                                 | 8 (20.5%)                               |
| <b>Tumor localization</b> |                                           |                                         |                                           |                                         |
| Colon                     | 20 (51.3%)                                | 25 (64.1%)                              | 22 (56.4%)                                | 23 (59.0%)                              |
| Rectum                    | 19 (48.7%)                                | 14 (35.9%)                              | 17 (43.6%)                                | 16 (41.0%)                              |

ND: No data



**Supplementary Table S6. Identification of AP3D1 as binding partner for both IFNGR1 and optineurin**

| <b>Identified Proteins</b> | <b>Description</b>                           | <b>Peptides</b>                                                                                                                   | <b>Protein ID</b> |
|----------------------------|----------------------------------------------|-----------------------------------------------------------------------------------------------------------------------------------|-------------------|
| <b>AP3D1</b>               | Adaptor protein complex AP-3 subunit delta-1 | ALDIDLKPLADSEKLPK (Both)<br>GMELSVLDSLNR (Both)<br>LLESGDLSMSSIK (Both)<br>LLESGDLSMSSIKVDGIR (Both)<br>VTTLPGHIQAVYVQNVVK (Both) | O14617            |
| <b>AP3B1</b>               | Adaptor protein complex AP-3 subunit beta-1  | LLDSITVPVAR (Both)                                                                                                                | O00203            |
| <b>AP3M1</b>               | Adaptor protein complex AP-3 subunit mu-1    | VLSFIPPDGNFR (Both)<br>VSSQNLVAIPVYVK (Only optineurin)                                                                           | Q9Y2T2            |

## Supplementary Table S7. PCR primers

| Target Gene                             | Forward primer                        | Reverse primer                       |
|-----------------------------------------|---------------------------------------|--------------------------------------|
| <b>Human <i>Optineurin</i></b>          | ACTCTGACCAGCAGGCTTACCT                | CTATGTCAGGCAGAACCTCTCC               |
| <b>Human <i>IFNGR1</i></b>              | AGTGCTTAGCCTGGTATTCATCTG              | GGCTGGTATGACGTGATGAGTG               |
| <b>Mouse <i>Ifngr1</i></b>              | CTTGAACCCTGTCGTATGCTGG                | TTGGTGCAGGAATCAGTCCAGG               |
| <b>Human <i>HLA-ABC</i></b>             | CCTACGACGGCAAGGATTAC                  | TGCCAGGTCAGTGTGATCTC                 |
| <b>Mouse <i>H2kb</i></b>                | GGCAATGAGCAGAGTTTCCGAG                | CCACTTCACAGCCAGAGATCAC               |
| <b>Human <math>\beta</math>-Actin</b>   | ATCCGCCGCCCGTCCACA                    | ACCATCACGCCCTGGTGCCT                 |
| <b>Mouse <math>\beta</math>-Actin</b>   | CATTGCTGACAGGATGCAGAAGG               | TGCTGGAAGGTGGACAGTGAGG               |
| <b><i>IFNGR1</i><br/>(C122A mutant)</b> | CAGAAGAATTTGCTGTAGCCCGAGATGGAAAAATTGG | CCAATTTTCCATCTCGGGCTACAGCAAATTCTTCTG |

**Supplementary Table S8. MHC-I and IFN signaling signatures in colorectal cancer**

| MHC-I           |            |          | IFN             |           |           |
|-----------------|------------|----------|-----------------|-----------|-----------|
| Gene            | logFC      | P Value  | Gene            | logFC     | P Value   |
| <i>HLA.F</i>    | 1.41395279 | 1.03E-75 | <i>OAS2</i>     | 2.1278918 | 2.04E-100 |
| <i>HLA.B</i>    | 1.11989186 | 1.28E-66 | <i>IFIT3.x</i>  | 1.7414237 | 8.37E-97  |
| <i>HLA.A</i>    | 0.95195055 | 2.24E-66 | <i>RSAD2</i>    | 1.9709754 | 3.77E-85  |
| <i>HLA.E</i>    | 0.74812381 | 1.13E-64 | <i>IFI44L</i>   | 2.62901   | 7.04E-84  |
| <i>HLA.C</i>    | 0.93116597 | 6.03E-62 | <i>MX1</i>      | 1.8760285 | 1.63E-83  |
| <i>HCP5</i>     | 1.15786853 | 3.16E-55 | <i>PARP9</i>    | 1.0117091 | 8.49E-81  |
| <i>HLA.H</i>    | 1.16147808 | 1.07E-50 | <i>IFIT1</i>    | 2.0366698 | 1.34E-78  |
| <i>BTN3A3</i>   | 0.88624856 | 3.22E-48 | <i>DDX60</i>    | 1.3685832 | 5.22E-75  |
| <i>BTN3A1</i>   | 0.78706868 | 1.16E-44 | <i>IFI44</i>    | 1.726729  | 1.22E-74  |
| <i>PSMB9</i>    | 1.04852593 | 4.34E-42 | <i>DDX58</i>    | 1.0038025 | 2.28E-73  |
| <i>TAP1</i>     | 0.9045302  | 1.22E-41 | <i>IFIT2</i>    | 1.4383886 | 1.29E-69  |
| <i>PSMB8</i>    | 0.58818543 | 4.38E-30 | <i>CMPK2</i>    | 1.4741036 | 8.01E-69  |
| <i>BTN3A2</i>   | 0.62749689 | 5.32E-30 | <i>STAT1</i>    | 1.0909087 | 1.65E-64  |
| <i>BTN2A2</i>   | 0.5480004  | 9.63E-30 | <i>SAMD9L</i>   | 1.4622512 | 5.09E-61  |
| <i>NLRC5</i>    | 0.74607379 | 1.37E-27 | <i>PARP14</i>   | 0.9268966 | 2.67E-60  |
| <i>HLA.G</i>    | 1.13049148 | 6.09E-26 | <i>IFI6</i>     | 1.7698809 | 7.64E-60  |
| <i>HCG4P11</i>  | 1.35176457 | 7.09E-26 | <i>OAS3</i>     | 1.0768439 | 4.60E-58  |
| <i>CD74</i>     | 0.97184214 | 1.28E-25 | <i>GBP1</i>     | 1.3194004 | 9.16E-57  |
| <i>TAP2</i>     | 0.6014486  | 1.30E-25 | <i>ISG15</i>    | 1.4550293 | 1.06E-54  |
| <i>HLA.DMA</i>  | 0.92259965 | 4.19E-25 | <i>UBE2L6</i>   | 1.1257711 | 5.49E-53  |
| <i>UBE2L6</i>   | 0.79002411 | 1.22E-24 | <i>IFIH1</i>    | 0.8684    | 1.84E-51  |
| <i>ETV7</i>     | 0.85524514 | 4.20E-24 | <i>XAF1</i>     | 1.3023888 | 1.87E-51  |
| <i>IRF1</i>     | 0.65771391 | 5.70E-24 | <i>GBP4</i>     | 1.6669084 | 1.04E-50  |
| <i>APOL3</i>    | 0.85108386 | 9.27E-23 | <i>CXCL10</i>   | 2.1187915 | 2.30E-50  |
| <i>HLA.DMB</i>  | 0.95815719 | 5.41E-22 | <i>SAMHD1</i>   | 0.8376622 | 2.90E-49  |
| <i>CCL5</i>     | 1.04185253 | 1.19E-21 | <i>SP100</i>    | 0.6115045 | 1.36E-48  |
| <i>IL15RA</i>   | 0.47758457 | 2.68E-21 | <i>IFIT5</i>    | 0.8203921 | 1.38E-48  |
| <i>HCST</i>     | 0.83117101 | 8.19E-21 | <i>HERC6</i>    | 0.940609  | 1.87E-48  |
| <i>PSMB10</i>   | 0.54776622 | 1.90E-20 | <i>SAMD9</i>    | 1.3109065 | 7.59E-48  |
| <i>HLA.DRA</i>  | 1.05065499 | 2.67E-20 | <i>BST2</i>     | 1.7349855 | 1.46E-47  |
| <i>SLC15A3</i>  | 0.74549187 | 2.73E-20 | <i>TYMP</i>     | 1.301277  | 4.36E-47  |
| <i>RARRES3</i>  | 1.05181993 | 5.39E-20 | <i>CD74</i>     | 1.2787447 | 2.27E-46  |
| <i>C10orf54</i> | 0.54659649 | 5.94E-20 | <i>USP18</i>    | 1.1410467 | 8.84E-46  |
| <i>HLA.DRB1</i> | 0.97631288 | 9.05E-20 | <i>SLC15A3</i>  | 1.0934439 | 1.22E-45  |
| <i>WAS</i>      | 0.68726469 | 9.43E-20 | <i>HLA.DRA</i>  | 1.5316293 | 4.39E-45  |
| <i>HLA.DPB1</i> | 0.95230556 | 1.26E-19 | <i>MX2</i>      | 1.1168286 | 7.47E-45  |
| <i>GBP2</i>     | 0.67423941 | 1.92E-19 | <i>LAP3</i>     | 0.636091  | 1.51E-44  |
| <i>APOL2</i>    | 0.59462517 | 2.02E-19 | <i>TRIM22</i>   | 1.1956043 | 7.74E-44  |
| <i>CD72</i>     | 0.64160096 | 2.16E-19 | <i>STAT2</i>    | 0.6777948 | 8.99E-44  |
| <i>IL12RB1</i>  | 0.81118451 | 3.00E-19 | <i>RARRES3</i>  | 1.5311107 | 2.34E-42  |
| <i>GBP4</i>     | 1.0176423  | 1.66E-18 | <i>HLA.DMB</i>  | 1.3032155 | 8.42E-42  |
| <i>HLA.DPA1</i> | 1.03312875 | 2.98E-18 | <i>HLA.DRB1</i> | 1.3874786 | 3.04E-41  |
| <i>SELPLG</i>   | 0.70913472 | 3.00E-18 | <i>TAP1</i>     | 0.8994499 | 7.56E-41  |

|                 |            |          |                 |           |          |
|-----------------|------------|----------|-----------------|-----------|----------|
| <i>FGD2</i>     | 0.63334719 | 3.51E-18 | <i>CXCL11</i>   | 2.1295744 | 1.33E-40 |
| <i>AIM2</i>     | 1.37507152 | 3.77E-18 | <i>SIGLEC1</i>  | 1.52915   | 1.34E-40 |
| <i>SASH3</i>    | 0.72714237 | 3.83E-18 | <i>GBP1P1</i>   | 1.6348309 | 1.63E-40 |
| <i>PGLYRP2</i>  | 1.23553398 | 4.54E-18 | <i>TNFSF13B</i> | 1.2907711 | 4.36E-40 |
| <i>PSTPIP1</i>  | 0.5986463  | 7.94E-18 | <i>GBP5</i>     | 1.6653661 | 4.83E-40 |
| <i>HLA.DRB5</i> | 1.11329801 | 8.58E-18 | <i>HLA.DPA1</i> | 1.5050897 | 4.97E-40 |
| <i>HLA.J</i>    | 0.95078129 | 8.79E-18 | <i>TRIM69</i>   | 0.7121708 | 8.14E-40 |
| <i>OR2I1P</i>   | 1.27046255 | 1.05E-17 | <i>ICAM1</i>    | 1.0142351 | 8.91E-40 |
| <i>TAPBP</i>    | 0.40632825 | 1.15E-17 | <i>CCL8</i>     | 2.00921   | 2.76E-39 |
| <i>ICAM1</i>    | 0.68222822 | 1.31E-17 | <i>HLA.E</i>    | 0.6057793 | 3.35E-39 |
| <i>TYMP</i>     | 0.8102277  | 1.35E-17 | <i>CCL5</i>     | 1.3956512 | 5.05E-39 |
| <i>CD52</i>     | 0.77546715 | 1.49E-17 | <i>HLA.DPB1</i> | 1.322839  | 6.16E-39 |
| <i>SECTM1</i>   | 0.93442251 | 1.54E-17 | <i>HAVCR2</i>   | 1.1760946 | 6.81E-39 |
| <i>CSF1</i>     | 0.56542783 | 2.18E-17 | <i>CD86</i>     | 1.1712036 | 2.95E-38 |
| <i>THEMIS2</i>  | 0.61553029 | 3.65E-17 | <i>OASL</i>     | 1.2161407 | 2.98E-38 |
| <i>PIK3CD</i>   | 0.64353516 | 4.78E-17 | <i>CXCL9</i>    | 1.9490192 | 3.27E-38 |
| <i>HLA.W</i>    | 0.89734245 | 6.56E-17 | <i>CD274</i>    | 1.2257661 | 3.56E-38 |
| <i>GBP1</i>     | 0.7416352  | 6.61E-17 | <i>HAPLN3</i>   | 1.1215236 | 3.75E-38 |
| <i>TRANK1</i>   | 0.53184449 | 6.85E-17 | <i>SLAMF8</i>   | 1.2019697 | 5.73E-38 |
| <i>CIITA</i>    | 0.9333822  | 7.12E-17 | <i>IRF1</i>     | 0.8198886 | 8.37E-38 |
| <i>UBA7</i>     | 0.49200695 | 7.37E-17 | <i>HLA.DMA</i>  | 1.1273233 | 9.20E-38 |
| <i>CYTH4</i>    | 0.70189773 | 7.89E-17 | <i>APOL2</i>    | 0.8191343 | 1.73E-37 |
| <i>IL16</i>     | 0.67830506 | 8.49E-17 | <i>APOL3</i>    | 1.0876545 | 2.19E-37 |
| <i>NKG7</i>     | 0.94504606 | 8.57E-17 | <i>CCR5</i>     | 1.1146164 | 2.24E-37 |
| <i>DOK2</i>     | 0.69882779 | 9.57E-17 | <i>C1QA</i>     | 1.2033372 | 2.79E-37 |
| <i>C19orf38</i> | 0.75335635 | 1.45E-16 | <i>LAPTM5</i>   | 1.1583502 | 3.10E-37 |
| <i>UBASH3A</i>  | 0.75785582 | 1.47E-16 | <i>FCGR3A</i>   | 1.5654871 | 4.85E-37 |
| <i>MYO1G</i>    | 0.67935379 | 1.49E-16 | <i>CTSL</i>     | 1.0066749 | 5.05E-37 |
| <i>LSP1</i>     | 0.68311528 | 1.61E-16 | <i>CD53</i>     | 1.2019207 | 8.01E-37 |
| <i>ARHGAP9</i>  | 0.65459981 | 1.64E-16 | <i>BTN3A3</i>   | 0.7798623 | 3.99E-36 |
| <i>ITGAL</i>    | 0.76619369 | 2.21E-16 | <i>PDCD1LG2</i> | 1.3851532 | 4.92E-36 |
| <i>X1.Sep</i>   | 0.54182578 | 2.33E-16 | <i>APOL6</i>    | 0.7072961 | 5.63E-36 |
| <i>CD37</i>     | 0.77064175 | 3.20E-16 | <i>IRF7</i>     | 0.8391317 | 8.36E-36 |
| <i>CD3E</i>     | 0.77379643 | 3.69E-16 | <i>LILRB4</i>   | 1.3840015 | 9.87E-36 |
| <i>ODF3B</i>    | 0.68543837 | 4.92E-16 | <i>FPR3</i>     | 1.3059659 | 1.42E-35 |
| <i>HLA.L</i>    | 1.17532922 | 6.44E-16 | <i>CCR1</i>     | 1.0608624 | 1.50E-35 |
| <i>IL2RB</i>    | 0.74600526 | 6.84E-16 | <i>IDO1</i>     | 2.0078862 | 1.60E-35 |
| <i>NCF1</i>     | 0.80982987 | 7.29E-16 | <i>TIGIT</i>    | 1.2911599 | 1.69E-35 |
| <i>TRAC</i>     | 0.70797164 | 7.72E-16 | <i>GIMAP4</i>   | 0.8972588 | 1.70E-35 |
| <i>CD82</i>     | 0.45660214 | 7.77E-16 | <i>BTK</i>      | 1.0570068 | 1.94E-35 |
| <i>HLA.DOA</i>  | 0.93798682 | 9.47E-16 | <i>FCER1G</i>   | 1.1107733 | 3.27E-35 |
| <i>TRBC2</i>    | 0.76758292 | 1.00E-15 | <i>IFI16</i>    | 1.0856596 | 3.31E-35 |
| <i>SLAMF8</i>   | 0.77558    | 1.09E-15 | <i>SCIMP</i>    | 1.0945375 | 4.34E-35 |
| <i>SPI1</i>     | 0.70404976 | 1.11E-15 | <i>SLA</i>      | 1.0367688 | 4.90E-35 |
| <i>FMNL1</i>    | 0.57789279 | 1.24E-15 | <i>LCP2</i>     | 0.9992386 | 8.47E-35 |
| <i>HCG4P7</i>   | 0.90256594 | 1.34E-15 | <i>AIF1</i>     | 0.9121684 | 1.25E-34 |
| <i>SLA</i>      | 0.69422719 | 1.36E-15 | <i>LSP1</i>     | 0.9816263 | 1.93E-34 |

|                  |            |          |                 |           |          |
|------------------|------------|----------|-----------------|-----------|----------|
| <i>IL18BP</i>    | 0.51421398 | 1.46E-15 | <i>SRGN</i>     | 1.1963829 | 2.14E-34 |
| <i>MYO1F</i>     | 0.56290592 | 1.47E-15 | <i>HERC5</i>    | 1.0874062 | 2.65E-34 |
| <i>IFNG</i>      | 1.31428876 | 1.48E-15 | <i>MNDA</i>     | 1.2709011 | 3.51E-34 |
| <i>ARHGAP30</i>  | 0.65975683 | 1.73E-15 | <i>HCLS1</i>    | 0.924002  | 7.46E-34 |
| <i>TBC1D10C</i>  | 0.69574399 | 1.97E-15 | <i>TNFRSF9</i>  | 1.0557868 | 1.14E-33 |
| <i>CD53</i>      | 0.78028838 | 2.23E-15 | <i>APOL1</i>    | 1.1375466 | 1.28E-33 |
| <i>IFIT3.x</i>   | 0.74574077 | 2.40E-15 | <i>CD84</i>     | 1.2724908 | 1.29E-33 |
| <i>HLA.DOB</i>   | 0.80599357 | 3.13E-15 | <i>APOBEC3G</i> | 1.0134096 | 1.48E-33 |
| <i>XAF1</i>      | 0.71841463 | 3.14E-15 | <i>RASGRP3</i>  | 0.7401237 | 1.49E-33 |
| <i>TNFAIP8L2</i> | 0.55668354 | 3.66E-15 | <i>CYBB</i>     | 1.2128209 | 1.57E-33 |
| <i>GPSM3</i>     | 0.47793669 | 3.71E-15 | <i>APBB1IP</i>  | 1.0224296 | 2.07E-33 |
| <i>RASAL3</i>    | 0.59551738 | 3.92E-15 | <i>PLEK</i>     | 1.3109973 | 2.40E-33 |
| <i>CD247</i>     | 0.65089733 | 3.98E-15 | <i>PTPRC</i>    | 1.2748392 | 3.42E-33 |
| <i>CD274</i>     | 0.76564316 | 4.68E-15 | <i>NCF2</i>     | 1.1535536 | 3.49E-33 |
| <i>IKZF1</i>     | 0.74178146 | 4.97E-15 | <i>IFI27</i>    | 0.9685636 | 3.56E-33 |
| <i>SAMD9L</i>    | 0.74742767 | 5.84E-15 | <i>KLRD1</i>    | 1.526663  | 3.76E-33 |
| <i>NCF1C</i>     | 0.79984394 | 6.65E-15 | <i>CCL7</i>     | 2.0293256 | 3.78E-33 |
| <i>HCG4P5</i>    | 1.1873953  | 7.52E-15 | <i>MAFB</i>     | 1.1024796 | 4.96E-33 |
| <i>RHOH</i>      | 0.7083411  | 8.07E-15 | <i>TFEC</i>     | 1.2599907 | 5.31E-33 |
| <i>S1PR4</i>     | 0.7480271  | 8.90E-15 | <i>EPSTI1</i>   | 1.0328322 | 6.76E-33 |
| <i>HCG4</i>      | 1.09318699 | 9.82E-15 | <i>SPI1</i>     | 1.0121745 | 6.97E-33 |
| <i>IDO1</i>      | 1.25941709 | 1.04E-14 | <i>CIITA</i>    | 1.3122952 | 6.99E-33 |
| <i>LGALS9</i>    | 0.47137635 | 1.19E-14 | <i>P2RX7</i>    | 1.0185949 | 7.55E-33 |
| <i>CD8A.x</i>    | 0.90676255 | 1.23E-14 | <i>ITGB2</i>    | 1.2519397 | 7.86E-33 |
| <i>CCR5</i>      | 0.69852089 | 1.39E-14 | <i>PARVG</i>    | 0.86124   | 8.02E-33 |
| <i>C1QC</i>      | 0.80566829 | 1.53E-14 | <i>LCP1</i>     | 1.1393391 | 8.52E-33 |
| <i>LY9</i>       | 0.86495139 | 1.78E-14 | <i>IL10RA</i>   | 1.0364916 | 9.09E-33 |
| <i>IL21R</i>     | 0.73959353 | 1.90E-14 | <i>C1QB</i>     | 1.241905  | 9.32E-33 |
| <i>NAGK</i>      | 0.27956283 | 1.98E-14 | <i>FYB</i>      | 1.1278421 | 1.01E-32 |
| <i>NCR3</i>      | 0.9271683  | 1.99E-14 | <i>IFI35</i>    | 0.6482235 | 1.09E-32 |
| <i>HCLS1</i>     | 0.6021989  | 2.14E-14 | <i>LAIR1</i>    | 1.0279054 | 1.31E-32 |
| <i>STX11</i>     | 0.71093502 | 2.16E-14 | <i>ITGAL</i>    | 1.0767168 | 1.88E-32 |
| <i>APOL1</i>     | 0.74244153 | 2.32E-14 | <i>PSMB9</i>    | 0.9310368 | 2.10E-32 |
| <i>PARP9</i>     | 0.45502699 | 2.55E-14 | <i>PLA2G7</i>   | 1.0000362 | 2.33E-32 |
| <i>TBX21</i>     | 0.89461309 | 2.65E-14 | <i>CLEC7A</i>   | 1.1464567 | 2.33E-32 |
| <i>LILRB1</i>    | 0.69727365 | 2.78E-14 | <i>TYROBP</i>   | 1.1213219 | 2.69E-32 |
| <i>DOK3</i>      | 0.5170499  | 2.82E-14 | <i>ARHGAP25</i> | 0.7745632 | 2.77E-32 |
| <i>FAM78A</i>    | 0.53221868 | 3.04E-14 | <i>PARP12</i>   | 0.5875101 | 3.70E-32 |
| <i>MAP4K1</i>    | 0.63091782 | 3.10E-14 | <i>GPNMB</i>    | 1.4733626 | 3.90E-32 |
| <i>C1QA</i>      | 0.74492853 | 3.28E-14 | <i>C1QC</i>     | 1.1883976 | 4.39E-32 |
| <i>GBP5</i>      | 0.98886274 | 3.42E-14 | <i>ICOS</i>     | 1.1557355 | 6.39E-32 |
| <i>PIK3R5</i>    | 0.65555925 | 3.44E-14 | <i>CYTH4</i>    | 0.960559  | 6.91E-32 |
| <i>TNFSF14</i>   | 0.70970737 | 3.64E-14 | <i>C1orf162</i> | 0.8378315 | 9.92E-32 |
| <i>IL10RA</i>    | 0.68003415 | 3.83E-14 | <i>SERPING1</i> | 1.1446513 | 1.10E-31 |
| <i>LGALS12</i>   | 1.17023084 | 4.22E-14 | <i>SECTM1</i>   | 1.2675619 | 1.36E-31 |
| <i>CXCL10</i>    | 1.11929198 | 4.40E-14 | <i>TRAC</i>     | 0.9973453 | 1.47E-31 |
| <i>HLA.DQA1</i>  | 0.89079606 | 4.96E-14 | <i>WARS</i>     | 0.8045897 | 1.58E-31 |

|                 |            |          |                 |           |          |
|-----------------|------------|----------|-----------------|-----------|----------|
| <i>TTC7A</i>    | 0.32287521 | 5.14E-14 | <i>SASH3</i>    | 0.9507234 | 1.67E-31 |
| <i>HAPLN3</i>   | 0.68095495 | 5.21E-14 | <i>IL21R</i>    | 1.0888747 | 2.78E-31 |
| <i>LAPTM5</i>   | 0.71271332 | 5.67E-14 | <i>CSF1</i>     | 0.7550573 | 3.54E-31 |
| <i>CD14</i>     | 0.67024362 | 6.02E-14 | <i>IL2RB</i>    | 1.0453769 | 3.79E-31 |
| <i>UBD</i>      | 1.08952608 | 6.15E-14 | <i>SAMSN1</i>   | 1.03099   | 3.93E-31 |
| <i>GBA</i>      | 0.289047   | 6.52E-14 | <i>PLEKHO1</i>  | 0.783612  | 4.13E-31 |
| <i>FTH1P22</i>  | 1.01402828 | 6.61E-14 | <i>SP110</i>    | 0.6710954 | 4.57E-31 |
| <i>LAIR1</i>    | 0.6696334  | 7.16E-14 | <i>AIM2</i>     | 1.7961536 | 4.92E-31 |
| <i>TYROBP</i>   | 0.73484349 | 7.24E-14 | <i>EVI2B</i>    | 1.0688043 | 5.13E-31 |
| <i>DPYD</i>     | 0.76634049 | 7.38E-14 | <i>APOE</i>     | 1.5838597 | 5.56E-31 |
| <i>CD48</i>     | 0.72531308 | 7.62E-14 | <i>HLA.DOA</i>  | 1.316145  | 6.38E-31 |
| <i>NFAM1</i>    | 0.55272913 | 7.90E-14 | <i>DOCK2</i>    | 1.0699124 | 7.01E-31 |
| <i>SIGLEC10</i> | 0.67973467 | 8.11E-14 | <i>CMKLR1</i>   | 1.024963  | 7.14E-31 |
| <i>LAG3</i>     | 0.7513369  | 8.18E-14 | <i>DOK2</i>     | 0.9432319 | 7.24E-31 |
| <i>APOBEC3G</i> | 0.64525215 | 8.93E-14 | <i>NCKAP1L</i>  | 1.0070582 | 8.20E-31 |
| <i>GZMH</i>     | 0.93375817 | 9.38E-14 | <i>CD48</i>     | 1.0876547 | 8.55E-31 |
| <i>DNASE2</i>   | 0.28744351 | 9.61E-14 | <i>EVI2A</i>    | 1.130619  | 9.01E-31 |
| <i>ACAP1</i>    | 0.5555768  | 9.68E-14 | <i>CXCL13</i>   | 2.0593042 | 9.29E-31 |
| <i>GIMAP1</i>   | 0.48559905 | 9.83E-14 | <i>CD2</i>      | 1.072725  | 9.80E-31 |
| <i>PARP12</i>   | 0.38338549 | 1.04E-13 | <i>DTX3L</i>    | 0.4817284 | 1.95E-30 |
| <i>APOL4</i>    | 0.71003755 | 1.05E-13 | <i>HLA.DQA1</i> | 1.3196942 | 2.30E-30 |
| <i>C16orf54</i> | 0.83565853 | 1.10E-13 | <i>CLEC2B</i>   | 0.916651  | 2.64E-30 |
| <i>IFI35</i>    | 0.41595202 | 1.22E-13 | <i>ITGAX</i>    | 1.0793918 | 2.76E-30 |
| <i>BAK1</i>     | 0.3556199  | 1.26E-13 | <i>ARHGAP30</i> | 0.922061  | 3.90E-30 |
| <i>NCF1B</i>    | 0.8385355  | 1.33E-13 | <i>WAS</i>      | 0.8416857 | 4.09E-30 |
| <i>DOCK2</i>    | 0.70800961 | 1.40E-13 | <i>NCF1</i>     | 1.1071425 | 4.42E-30 |
| <i>ZMYND15</i>  | 0.52124524 | 1.41E-13 | <i>PIK3AP1</i>  | 0.9626182 | 5.06E-30 |
| <i>ARHGAP25</i> | 0.49961562 | 1.41E-13 | <i>CD4</i>      | 0.9751464 | 5.08E-30 |
| <i>CD300A</i>   | 0.64970949 | 1.48E-13 | <i>STX11</i>    | 1.0257135 | 6.52E-30 |
| <i>SERPINB9</i> | 0.41100204 | 1.81E-13 | <i>IFNG</i>     | 1.8116835 | 7.22E-30 |
| <i>C5orf56</i>  | 0.42876066 | 1.94E-13 | <i>CD300LF</i>  | 1.0294615 | 7.28E-30 |
| <i>C19orf66</i> | 0.34408271 | 2.08E-13 | <i>HCK</i>      | 0.973237  | 7.77E-30 |
| <i>PLCG2</i>    | 0.59047173 | 2.48E-13 | <i>IKZF1</i>    | 1.0468105 | 8.01E-30 |
| <i>ITGB2</i>    | 0.79534764 | 2.63E-13 | <i>FMNL1</i>    | 0.7968507 | 8.57E-30 |
| <i>IL2RA</i>    | 0.73465817 | 2.64E-13 | <i>HLA.DRB5</i> | 1.4372355 | 9.96E-30 |
| <i>PIK3AP1</i>  | 0.63678251 | 2.66E-13 | <i>KLHDC7B</i>  | 1.1544733 | 1.52E-29 |
| <i>IL15</i>     | 0.55920193 | 2.88E-13 | <i>LILRB1</i>   | 1.0008839 | 1.86E-29 |
| <i>ABI3</i>     | 0.47801751 | 3.16E-13 | <i>SP140</i>    | 1.0724756 | 1.91E-29 |
| <i>CXCL9</i>    | 1.12947569 | 3.39E-13 | <i>CLIC2</i>    | 0.8876525 | 1.92E-29 |
| <i>PLD3</i>     | 0.32542459 | 3.39E-13 | <i>C3AR1</i>    | 1.1088383 | 1.92E-29 |
| <i>APBB1IP</i>  | 0.63976498 | 3.54E-13 | <i>TAP2</i>     | 0.6441243 | 1.98E-29 |
| <i>PTAFR</i>    | 0.68398636 | 3.80E-13 | <i>DDX60L</i>   | 0.7511187 | 2.00E-29 |
| <i>CD96</i>     | 0.71086902 | 3.83E-13 | <i>CFH</i>      | 1.0255214 | 2.02E-29 |
| <i>NFKB2</i>    | 0.34949584 | 4.23E-13 | <i>FAM78A</i>   | 0.7645611 | 2.35E-29 |
| <i>CCL4</i>     | 0.75379265 | 4.44E-13 | <i>LY96</i>     | 1.0470307 | 2.40E-29 |
| <i>CD6</i>      | 0.52308644 | 4.50E-13 | <i>PLXNC1</i>   | 0.9244453 | 2.70E-29 |
| <i>PDCD1</i>    | 0.75815387 | 4.68E-13 | <i>FGR</i>      | 1.0009896 | 2.88E-29 |

|                 |            |          |                  |           |          |
|-----------------|------------|----------|------------------|-----------|----------|
| <i>SLA2</i>     | 0.60742887 | 4.90E-13 | <i>CFAP54</i>    | 1.3616306 | 3.15E-29 |
| <i>CTSD</i>     | 0.36273595 | 4.97E-13 | <i>FCGR2B</i>    | 1.2907038 | 3.50E-29 |
| <i>TAGAP</i>    | 0.6605007  | 5.03E-13 | <i>CLEC4E</i>    | 1.5762067 | 4.11E-29 |
| <i>GZMM</i>     | 0.75035822 | 5.11E-13 | <i>CCL18</i>     | 2.083036  | 5.01E-29 |
| <i>SMAP2</i>    | 0.28814693 | 5.16E-13 | <i>SIRPB2</i>    | 1.0628283 | 5.31E-29 |
| <i>LRRC25</i>   | 0.62485415 | 5.68E-13 | <i>SIGLEC10</i>  | 0.9884963 | 5.58E-29 |
| <i>STAT1</i>    | 0.50434403 | 6.54E-13 | <i>CD8A.x</i>    | 1.2822558 | 6.48E-29 |
| <i>NCKAP1L</i>  | 0.64725603 | 6.56E-13 | <i>DPYD</i>      | 1.1176218 | 7.66E-29 |
| <i>ICAM3</i>    | 0.77292754 | 6.75E-13 | <i>IL18BP</i>    | 0.6985967 | 1.14E-28 |
| <i>TTC24</i>    | 1.06311726 | 6.99E-13 | <i>PTAFR</i>     | 1.0189394 | 1.23E-28 |
| <i>GMFG</i>     | 0.46738678 | 7.20E-13 | <i>HLA.C</i>     | 0.6628439 | 1.49E-28 |
| <i>PDE6G</i>    | 0.67818334 | 7.27E-13 | <i>LINC01094</i> | 1.1506033 | 1.50E-28 |
| <i>TIGIT</i>    | 0.77294027 | 7.57E-13 | <i>B2M</i>       | 0.6750197 | 1.55E-28 |
| <i>CD2</i>      | 0.68679769 | 7.63E-13 | <i>FAM49A</i>    | 0.8885245 | 1.62E-28 |
| <i>EPST11</i>   | 0.64604294 | 7.80E-13 | <i>KLHL6</i>     | 1.0184289 | 2.08E-28 |
| <i>HK3</i>      | 0.80339002 | 7.91E-13 | <i>TRAF3IP3</i>  | 0.8790504 | 2.08E-28 |
| <i>PATL2</i>    | 0.56217278 | 8.01E-13 | <i>GBP2</i>      | 0.8175169 | 2.09E-28 |
| <i>TNFSF12</i>  | 0.43712046 | 8.40E-13 | <i>CD96</i>      | 1.0549302 | 2.25E-28 |
| <i>LILRP2</i>   | 0.99594329 | 8.64E-13 | <i>IL2RA</i>     | 1.0758554 | 2.82E-28 |
| <i>C1QB</i>     | 0.77345184 | 9.06E-13 | <i>TAGAP</i>     | 0.9841592 | 3.06E-28 |
| <i>TRIM22</i>   | 0.65209018 | 9.17E-13 | <i>UBD</i>       | 1.5690611 | 3.35E-28 |
| <i>MMP25</i>    | 0.61676565 | 9.62E-13 | <i>CD163</i>     | 1.4035086 | 3.43E-28 |
| <i>HLA.DQB1</i> | 0.88807156 | 9.77E-13 | <i>BCL2A1</i>    | 1.1803274 | 3.69E-28 |
| <i>ISG20</i>    | 0.55508838 | 9.83E-13 | <i>CD37</i>      | 1.0125128 | 3.74E-28 |
| <i>CD4</i>      | 0.63041178 | 1.00E-12 | <i>MS4A6A</i>    | 1.0132819 | 5.10E-28 |
| <i>TNFSF13B</i> | 0.72555793 | 1.15E-12 | <i>FCGR1A</i>    | 1.1915489 | 5.73E-28 |
| <i>TRIM69</i>   | 0.40118022 | 1.18E-12 | <i>HK3</i>       | 1.1945965 | 5.89E-28 |
| <i>OPTN</i>     | 0.3305723  | 1.26E-12 | <i>FBXO39</i>    | 1.5825086 | 6.07E-28 |
| <i>TRPV2</i>    | 0.50442462 | 1.28E-12 | <i>CCL4</i>      | 1.1190776 | 6.10E-28 |
| <i>B2M</i>      | 0.44444316 | 1.29E-12 | <i>ZBP1</i>      | 1.0299782 | 6.80E-28 |
| <i>CMKLR1</i>   | 0.65021586 | 1.33E-12 | <i>TLR8</i>      | 1.4731737 | 7.11E-28 |
| <i>HCK</i>      | 0.62663708 | 1.33E-12 | <i>ARHGAP9</i>   | 0.8488676 | 7.24E-28 |
| <i>LTB</i>      | 0.60191371 | 1.35E-12 | <i>SLA2</i>      | 0.892866  | 9.02E-28 |
| <i>LILRB4</i>   | 0.81520664 | 1.43E-12 | <i>BIRC3</i>     | 0.9565167 | 1.05E-27 |
| <i>CD3D</i>     | 0.68855111 | 1.46E-12 | <i>SELL</i>      | 1.1846846 | 1.21E-27 |
| <i>PLEKHO1</i>  | 0.49111878 | 1.66E-12 | <i>RAB31</i>     | 1.0786655 | 1.25E-27 |
| <i>CYLD</i>     | 0.30005183 | 1.73E-12 | <i>MILR1</i>     | 0.9129278 | 1.33E-27 |
| <i>FCGR1B</i>   | 0.90996809 | 1.80E-12 | <i>FCGR1B</i>    | 1.4029407 | 1.43E-27 |
| <i>SIRPG</i>    | 0.72845242 | 2.06E-12 | <i>DOCK10</i>    | 0.7984822 | 1.79E-27 |
| <i>CD27</i>     | 0.73747078 | 2.28E-12 | <i>TNFAIP8L2</i> | 0.7465295 | 2.14E-27 |
| <i>OSCAR</i>    | 0.62939371 | 2.45E-12 | <i>LY86</i>      | 0.8628396 | 2.48E-27 |
| <i>NECAP2</i>   | 0.23301409 | 2.47E-12 | <i>ZBED2</i>     | 1.5948424 | 2.67E-27 |
| <i>APOL6</i>    | 0.41188568 | 2.54E-12 | <i>PRRX1</i>     | 1.2814153 | 3.08E-27 |
| <i>CD7</i>      | 0.75931519 | 2.56E-12 | <i>MS4A4A</i>    | 1.1388272 | 3.13E-27 |
| <i>ZNF831</i>   | 0.83672099 | 2.63E-12 | <i>CECR1</i>     | 1.0698545 | 3.36E-27 |
| <i>FCRL6</i>    | 0.93126858 | 2.92E-12 | <i>IL4I1</i>     | 1.058935  | 3.73E-27 |
| <i>SPHK1</i>    | 0.73802297 | 2.95E-12 | <i>EVL</i>       | 0.7609113 | 4.71E-27 |

|                  |            |          |                  |           |          |
|------------------|------------|----------|------------------|-----------|----------|
| <i>CPNE5</i>     | 0.5378604  | 3.13E-12 | <i>IGSF6</i>     | 0.8836736 | 5.76E-27 |
| <i>KLHL6</i>     | 0.66105011 | 3.25E-12 | <i>SLC1A3</i>    | 1.304052  | 6.52E-27 |
| <i>TRGC1</i>     | 0.93126658 | 3.29E-12 | <i>NKG7</i>      | 1.1986089 | 7.24E-27 |
| <i>RTP4</i>      | 0.56750876 | 3.64E-12 | <i>LAG3</i>      | 1.0576687 | 7.68E-27 |
| <i>DTHD1</i>     | 1.07389803 | 3.70E-12 | <i>LILRB2</i>    | 0.9883477 | 8.26E-27 |
| <i>STK10</i>     | 0.27974621 | 3.70E-12 | <i>BTN3A1</i>    | 0.6239614 | 8.66E-27 |
| <i>LINC01127</i> | 1.09035204 | 3.91E-12 | <i>ARHGEF6</i>   | 0.7561998 | 9.05E-27 |
| <i>FGR</i>       | 0.63982474 | 3.97E-12 | <i>CRTAM</i>     | 1.5127563 | 9.25E-27 |
| <i>CXCR6</i>     | 0.66715226 | 4.28E-12 | <i>SLAMF7</i>    | 1.3011973 | 9.70E-27 |
| <i>WDFY4</i>     | 0.67585354 | 4.43E-12 | <i>VCAM1</i>     | 0.9180585 | 1.19E-26 |
| <i>LILRA4</i>    | 0.99269086 | 4.65E-12 | <i>UBASH3B</i>   | 0.9418917 | 1.22E-26 |
| <i>WARS</i>      | 0.48883879 | 4.72E-12 | <i>TRPV2</i>     | 0.7347795 | 1.34E-26 |
| <i>TRAF3IP3</i>  | 0.56449958 | 4.90E-12 | <i>CSF2RB</i>    | 1.0412905 | 1.44E-26 |
| <i>CSF2RB</i>    | 0.69225302 | 4.91E-12 | <i>GNB4</i>      | 0.8307823 | 1.65E-26 |
| <i>LCP2</i>      | 0.58113476 | 5.06E-12 | <i>TNFAIP2</i>   | 0.909861  | 1.68E-26 |
| <i>TRBV28</i>    | 0.63608916 | 5.19E-12 | <i>CD3E</i>      | 0.9918332 | 1.83E-26 |
| <i>CYTIP</i>     | 0.59843058 | 5.76E-12 | <i>GM2A</i>      | 0.4515723 | 1.84E-26 |
| <i>SP140</i>     | 0.67278003 | 6.22E-12 | <i>TRAV16</i>    | 1.4714864 | 2.35E-26 |
| <i>ALOX5</i>     | 0.7187294  | 6.34E-12 | <i>ARHGAP15</i>  | 0.6830484 | 3.31E-26 |
| <i>LST1</i>      | 0.5560818  | 6.34E-12 | <i>PIK3R5</i>    | 0.892219  | 3.52E-26 |
| <i>PARP14</i>    | 0.42192903 | 6.37E-12 | <i>C10orf128</i> | 0.8133912 | 3.61E-26 |
| <i>LILRB2</i>    | 0.6533345  | 6.51E-12 | <i>RHOH</i>      | 0.9450081 | 3.70E-26 |
| <i>C1orf162</i>  | 0.50330963 | 7.44E-12 | <i>FAM20A</i>    | 0.9508305 | 3.70E-26 |
| <i>PRF1</i>      | 0.75003358 | 7.82E-12 | <i>CLIP4</i>     | 0.9977192 | 3.78E-26 |
| <i>GZMK</i>      | 1.03085717 | 8.55E-12 | <i>MSR1</i>      | 1.3519812 | 3.87E-26 |
| <i>MGAT1</i>     | 0.25465211 | 8.63E-12 | <i>IL16</i>      | 0.8440688 | 4.10E-26 |
| <i>CD3G</i>      | 0.64483955 | 8.95E-12 | <i>CD14</i>      | 0.9225798 | 4.45E-26 |
| <i>PARVG</i>     | 0.50959207 | 9.62E-12 | <i>CYLD</i>      | 0.4384488 | 4.62E-26 |
| <i>RSAD2</i>     | 0.76687682 | 1.04E-11 | <i>CHST11</i>    | 0.8562295 | 4.63E-26 |
| <i>C10orf128</i> | 0.53680046 | 1.05E-11 | <i>FCGR2A</i>    | 0.9681811 | 4.91E-26 |
| <i>PPM1M</i>     | 0.36976938 | 1.08E-11 | <i>GMFG</i>      | 0.6697768 | 6.79E-26 |
| <i>SIGLEC9</i>   | 0.65499154 | 1.10E-11 | <i>SH2D1A</i>    | 1.2271835 | 6.80E-26 |
| <i>CD84</i>      | 0.7391745  | 1.14E-11 | <i>IFNL1</i>     | 1.0089261 | 7.93E-26 |
| <i>PTPRC</i>     | 0.74617998 | 1.20E-11 | <i>ADAMTS2</i>   | 1.1777224 | 8.03E-26 |
| <i>SYTL3</i>     | 0.34292483 | 1.30E-11 | <i>TBX21</i>     | 1.2068352 | 1.06E-25 |
| <i>MOB3C</i>     | 0.23760731 | 1.30E-11 | <i>ITGAM</i>     | 1.1638767 | 1.13E-25 |
| <i>ALOX5AP</i>   | 0.58933619 | 1.31E-11 | <i>MYO1F</i>     | 0.7236866 | 1.17E-25 |
| <i>ZBP1</i>      | 0.65280098 | 1.32E-11 | <i>LILRA4</i>    | 1.4908125 | 1.19E-25 |
| <i>CMPK2</i>     | 0.61929636 | 1.38E-11 | <i>PLEKHO2</i>   | 0.6639709 | 1.26E-25 |
| <i>SLAMF7</i>    | 0.84269969 | 1.44E-11 | <i>LTA</i>       | 0.9662746 | 1.32E-25 |
| <i>HLA.DRB9</i>  | 0.95466549 | 1.69E-11 | <i>RASSF5</i>    | 0.7624376 | 1.43E-25 |
| <i>PIK3R6</i>    | 0.49800679 | 1.70E-11 | <i>CD52</i>      | 0.9370939 | 1.52E-25 |
| <i>SIGLEC7</i>   | 0.71800658 | 1.72E-11 | <i>GZMK</i>      | 1.5339412 | 1.52E-25 |
| <i>HAVCR2</i>    | 0.63158047 | 1.79E-11 | <i>PPP1R18</i>   | 0.6782049 | 1.58E-25 |
| <i>RCSD1</i>     | 0.48037697 | 1.79E-11 | <i>FGL2</i>      | 1.0348971 | 1.80E-25 |
| <i>ACP2</i>      | 0.25660618 | 1.81E-11 | <i>KMO</i>       | 0.8996104 | 1.82E-25 |
| <i>METRNL</i>    | 0.47313832 | 1.82E-11 | <i>PILRA</i>     | 0.966833  | 1.86E-25 |



|                 |            |          |                   |           |          |
|-----------------|------------|----------|-------------------|-----------|----------|
| <i>SLAMF1</i>   | 0.60114124 | 1.83E-11 | <i>MAF</i>        | 0.7692175 | 2.05E-25 |
| <i>XCL2</i>     | 0.95984388 | 1.87E-11 | <i>GPR68</i>      | 0.8485549 | 2.12E-25 |
| <i>DDX58</i>    | 0.41234648 | 1.91E-11 | <i>MYO1G</i>      | 0.8363788 | 2.15E-25 |
| <i>CORO1A</i>   | 0.51129796 | 1.95E-11 | <i>CCL2</i>       | 1.0461736 | 2.23E-25 |
| <i>CTSW</i>     | 0.84297902 | 2.10E-11 | <i>APOBEC3A</i>   | 1.2700266 | 2.40E-25 |
| <i>JAK3</i>     | 0.45302291 | 2.13E-11 | <i>KCND2</i>      | 1.7332523 | 2.45E-25 |
| <i>GZMA</i>     | 0.78189705 | 2.16E-11 | <i>TLR1</i>       | 1.0084354 | 2.59E-25 |
| <i>LTA</i>      | 0.6343675  | 2.31E-11 | <i>LST1</i>       | 0.8181477 | 2.72E-25 |
| <i>ITK</i>      | 0.66324419 | 2.43E-11 | <i>PIP4K2A</i>    | 0.4230535 | 3.39E-25 |
| <i>RAB33A</i>   | 0.51512685 | 2.56E-11 | <i>PIK3CD</i>     | 0.781936  | 3.49E-25 |
| <i>SPOCK2</i>   | 0.57864329 | 2.57E-11 | <i>VIM</i>        | 0.8152021 | 4.17E-25 |
| <i>NLRC3</i>    | 0.43839888 | 2.57E-11 | <i>PYHIN1</i>     | 1.1521564 | 4.39E-25 |
| <i>TRGV10</i>   | 0.98742497 | 2.63E-11 | <i>CD300A</i>     | 0.8865489 | 4.42E-25 |
| <i>GBP1P1</i>   | 0.8607521  | 2.65E-11 | <i>ISG20</i>      | 0.785566  | 6.19E-25 |
| <i>PINK1</i>    | 0.34476198 | 2.79E-11 | <i>CD226</i>      | 1.0327471 | 7.34E-25 |
| <i>TCN2</i>     | 0.47532775 | 2.80E-11 | <i>GIMAP7</i>     | 0.7306876 | 7.53E-25 |
| <i>GM2A</i>     | 0.28940685 | 2.83E-11 | <i>CD80</i>       | 1.0057045 | 8.08E-25 |
| <i>IFI16</i>    | 0.61010256 | 2.91E-11 | <i>CD3G</i>       | 0.9498045 | 8.19E-25 |
| <i>HCG4P3</i>   | 0.67349308 | 2.99E-11 | <i>ITK</i>        | 0.9958529 | 9.09E-25 |
| <i>TAPBPL</i>   | 0.40212963 | 3.03E-11 | <i>SIGLEC9</i>    | 0.9588672 | 9.18E-25 |
| <i>ITGAM</i>    | 0.75806249 | 3.13E-11 | <i>ACP5</i>       | 0.8551427 | 1.72E-24 |
| <i>CD22</i>     | 0.87194968 | 3.43E-11 | <i>HCST</i>       | 0.8991903 | 1.85E-24 |
| <i>SIGLEC1</i>  | 0.80364436 | 3.48E-11 | <i>LINC00968</i>  | 1.4474892 | 1.88E-24 |
| <i>MAFB</i>     | 0.63539445 | 3.51E-11 | <i>LRRC25</i>     | 0.8589517 | 1.89E-24 |
| <i>TRIM21</i>   | 0.26811782 | 3.57E-11 | <i>OR2I1P</i>     | 1.4938964 | 2.09E-24 |
| <i>NAPSB</i>    | 0.60742115 | 3.66E-11 | <i>CLEC4A</i>     | 0.7794098 | 2.47E-24 |
| <i>DOCK8</i>    | 0.58492002 | 3.70E-11 | <i>CXorf21</i>    | 0.94872   | 2.47E-24 |
| <i>ZNF683</i>   | 1.06982835 | 3.75E-11 | <i>NLRC5</i>      | 0.7045897 | 2.51E-24 |
| <i>SLC2A5</i>   | 0.68323725 | 3.76E-11 | <i>HMOX1</i>      | 0.6982103 | 2.51E-24 |
| <i>SH2D1A</i>   | 0.79328435 | 3.85E-11 | <i>C1S</i>        | 1.00247   | 2.55E-24 |
| <i>CD86</i>     | 0.62496427 | 3.86E-11 | <i>FCRL6</i>      | 1.3493059 | 2.57E-24 |
| <i>SRGN</i>     | 0.67075339 | 3.89E-11 | <i>ADAR</i>       | 0.3782815 | 2.65E-24 |
| <i>SCIMP</i>    | 0.60947834 | 4.10E-11 | <i>MS4A7</i>      | 0.9714485 | 2.68E-24 |
| <i>CHI3L2</i>   | 0.80927712 | 4.54E-11 | <i>PMP22</i>      | 0.7897337 | 2.81E-24 |
| <i>IFI27</i>    | 0.55533983 | 4.68E-11 | <i>CD69</i>       | 1.1164576 | 3.18E-24 |
| <i>CLEC17A</i>  | 0.98625131 | 4.81E-11 | <i>MPEG1</i>      | 0.9840485 | 3.44E-24 |
| <i>VAMP5</i>    | 0.50982901 | 4.94E-11 | <i>TRAFD1</i>     | 0.3071066 | 3.95E-24 |
| <i>PLEK</i>     | 0.73966135 | 5.06E-11 | <i>APOC1</i>      | 1.2288464 | 3.98E-24 |
| <i>MR1</i>      | 0.42389299 | 5.07E-11 | <i>AQP9</i>       | 1.6272999 | 4.71E-24 |
| <i>PHF1</i>     | 0.2940166  | 5.93E-11 | <i>JAK2</i>       | 0.6773246 | 6.06E-24 |
| <i>HLA.DRB6</i> | 0.926833   | 6.92E-11 | <i>HNRNPA1P21</i> | 0.8914519 | 6.35E-24 |
| <i>CD300LF</i>  | 0.61222871 | 6.93E-11 | <i>HLA.F</i>      | 0.852632  | 6.66E-24 |
| <i>FCER2</i>    | 1.10555212 | 7.43E-11 | <i>GPR65</i>      | 0.8867442 | 6.81E-24 |
| <i>FAM26F</i>   | 0.73428893 | 7.52E-11 | <i>PML</i>        | 0.5210771 | 7.94E-24 |
| <i>IL4I1</i>    | 0.65842145 | 7.76E-11 | <i>GNGT2</i>      | 0.6971041 | 8.71E-24 |
| <i>GIMAP6</i>   | 0.50646764 | 7.77E-11 | <i>CTSK</i>       | 0.9396132 | 8.92E-24 |
| <i>GIMAP7</i>   | 0.47169419 | 7.93E-11 | <i>BLVRA</i>      | 0.7918929 | 9.78E-24 |

|                 |            |          |                 |           |          |
|-----------------|------------|----------|-----------------|-----------|----------|
| <i>TRGC2</i>    | 0.84442236 | 8.63E-11 | <i>SLC2A5</i>   | 1.0128042 | 9.94E-24 |
| <i>FASLG</i>    | 0.77806636 | 8.66E-11 | <i>CD33</i>     | 0.8303774 | 1.07E-23 |
| <i>TNFRSF18</i> | 0.58084116 | 9.09E-11 | <i>NRP1</i>     | 0.8206727 | 1.11E-23 |
| <i>CCL3</i>     | 0.7465966  | 9.12E-11 | <i>CSF1R</i>    | 0.9733759 | 1.20E-23 |
| <i>ZSCAN1</i>   | 0.63044372 | 9.15E-11 | <i>GGTA1P</i>   | 0.8901596 | 1.23E-23 |
| <i>EVI2B</i>    | 0.61898802 | 9.45E-11 | <i>IL12RB1</i>  | 0.8960118 | 1.42E-23 |
| <i>MICB</i>     | 0.59134502 | 9.65E-11 | <i>CD180</i>    | 0.9381271 | 1.58E-23 |
| <i>NCF2</i>     | 0.64506453 | 9.90E-11 | <i>TRBC2</i>    | 0.9406545 | 1.63E-23 |
| <i>DOCK10</i>   | 0.48869572 | 1.03E-10 | <i>SCPEP1</i>   | 0.6324906 | 1.79E-23 |
| <i>EVL</i>      | 0.46743969 | 1.06E-10 | <i>ALOX5AP</i>  | 0.8496291 | 1.95E-23 |
| <i>CSF1R</i>    | 0.64431779 | 1.07E-10 | <i>GIMAP6</i>   | 0.7606238 | 1.96E-23 |
| <i>HLA.DQB2</i> | 0.90959913 | 1.24E-10 | <i>GZMH</i>     | 1.23112   | 2.11E-23 |
| <i>MS4A4A</i>   | 0.69533355 | 1.27E-10 | <i>FLI1</i>     | 0.6645723 | 2.15E-23 |
| <i>DDX60</i>    | 0.53672653 | 1.30E-10 | <i>OAS1</i>     | 0.6230532 | 2.20E-23 |
| <i>IGSF6</i>    | 0.5382351  | 1.56E-10 | <i>LAMP3</i>    | 0.7450761 | 2.29E-23 |
| <i>SLC31A2</i>  | 0.48708773 | 1.56E-10 | <i>PLSCR1</i>   | 0.4742176 | 2.41E-23 |
| <i>ZBED2</i>    | 0.97149659 | 1.58E-10 | <i>THEMIS2</i>  | 0.7174693 | 2.54E-23 |
| <i>HLA.S</i>    | 0.87464724 | 1.58E-10 | <i>NCF1C</i>    | 1.0028766 | 2.64E-23 |
| <i>DPEP2</i>    | 0.56118464 | 1.61E-10 | <i>OPTN</i>     | 0.4538448 | 2.72E-23 |
| <i>BTK</i>      | 0.5697479  | 1.69E-10 | <i>TOMM20P2</i> | 1.3078651 | 3.25E-23 |
| <i>EIF4E3</i>   | 0.44496056 | 1.70E-10 | <i>JAKMIP1</i>  | 1.0786908 | 3.33E-23 |
| <i>GPR108</i>   | 0.2385617  | 1.72E-10 | <i>CCL13</i>    | 1.7936367 | 3.42E-23 |
| <i>C3AR1</i>    | 0.64890663 | 1.74E-10 | <i>LILRA6</i>   | 1.0311225 | 3.43E-23 |
| <i>HIVEP3</i>   | 0.43174414 | 1.80E-10 | <i>IL10</i>     | 1.137651  | 3.47E-23 |
| <i>IL9R</i>     | 0.74662166 | 1.84E-10 | <i>HVCN1</i>    | 0.5615503 | 3.56E-23 |
| <i>ITGAX</i>    | 0.62246001 | 1.88E-10 | <i>OLR1</i>     | 1.4723777 | 3.68E-23 |
| <i>AIF1</i>     | 0.49349895 | 1.88E-10 | <i>GZMA</i>     | 1.1422061 | 3.79E-23 |
| <i>HRH2</i>     | 0.81430643 | 2.02E-10 | <i>FOXP3</i>    | 0.7814132 | 4.07E-23 |
| <i>ARSA</i>     | 0.34765669 | 2.06E-10 | <i>ZNF804A</i>  | 1.28496   | 4.14E-23 |
| <i>KLHDC7B</i>  | 0.67828894 | 2.07E-10 | <i>ARL4C</i>    | 0.8915633 | 4.62E-23 |
| <i>MPEG1</i>    | 0.63228528 | 2.13E-10 | <i>ZEB2</i>     | 0.8409857 | 4.74E-23 |
| <i>PMP22</i>    | 0.50364133 | 2.17E-10 | <i>GPR174</i>   | 1.4589102 | 4.94E-23 |
| <i>GPR174</i>   | 0.94922374 | 2.28E-10 | <i>SIGLEC7</i>  | 1.0221151 | 6.19E-23 |
| <i>TLR6</i>     | 0.56670458 | 2.33E-10 | <i>MRC1</i>     | 1.2488813 | 6.95E-23 |
| <i>NTRK1</i>    | 0.71378342 | 2.39E-10 | <i>TRBV28</i>   | 0.8883284 | 7.21E-23 |
| <i>TCAF2</i>    | 0.54292991 | 2.43E-10 | <i>FAM26F</i>   | 1.0882139 | 7.36E-23 |
| <i>JAKMIP1</i>  | 0.70595351 | 2.45E-10 | <i>TIMP2</i>    | 0.9327366 | 7.49E-23 |
| <i>TMEM140</i>  | 0.30565896 | 2.45E-10 | <i>TRAV3</i>    | 1.4035162 | 8.03E-23 |
| <i>ACP5</i>     | 0.54393795 | 2.54E-10 | <i>LIPA</i>     | 0.5592236 | 8.28E-23 |
| <i>PILRA</i>    | 0.59751536 | 2.97E-10 | <i>LIMD2</i>    | 0.6906875 | 9.74E-23 |
| <i>HLA.U</i>    | 0.97626112 | 3.17E-10 | <i>MSN</i>      | 0.7134791 | 1.00E-22 |
| <i>PRKCB</i>    | 0.62219093 | 3.21E-10 | <i>PRKCB</i>    | 0.9528067 | 1.05E-22 |
| <i>POU2F2</i>   | 0.48188179 | 3.31E-10 | <i>FGD2</i>     | 0.7062435 | 1.07E-22 |
| <i>GPR68</i>    | 0.52651711 | 3.44E-10 | <i>ADAP2</i>    | 0.5607991 | 1.16E-22 |
| <i>SOCS3</i>    | 0.52585482 | 3.44E-10 | <i>ST8SIA4</i>  | 0.7414708 | 1.19E-22 |
| <i>PCDHGC5</i>  | 0.8749466  | 3.69E-10 | <i>MAP4K1</i>   | 0.7996243 | 1.25E-22 |
| <i>CHST11</i>   | 0.52123639 | 3.95E-10 | <i>NRIR</i>     | 1.4836873 | 1.31E-22 |

|                 |            |          |                 |           |          |
|-----------------|------------|----------|-----------------|-----------|----------|
| <i>TRAT1</i>    | 0.82601848 | 4.00E-10 | <i>FASLG</i>    | 1.1505012 | 1.31E-22 |
| <i>TNFSF10</i>  | 0.36816013 | 4.16E-10 | <i>GAB3</i>     | 0.5942056 | 1.32E-22 |
| <i>PPP1R18</i>  | 0.41682979 | 4.17E-10 | <i>CCR2</i>     | 1.1884154 | 1.53E-22 |
| <i>CBY3</i>     | 0.82898875 | 4.29E-10 | <i>RCSD1</i>    | 0.6831064 | 1.55E-22 |
| <i>TRBV18</i>   | 0.8336601  | 4.45E-10 | <i>CD247</i>    | 0.7960617 | 1.60E-22 |
| <i>GNLY</i>     | 0.81275632 | 4.46E-10 | <i>CCR8</i>     | 1.1884063 | 1.68E-22 |
| <i>TNIP1</i>    | 0.20168649 | 4.49E-10 | <i>TRBV19</i>   | 1.310203  | 1.70E-22 |
| <i>MS4A6A</i>   | 0.59554344 | 4.66E-10 | <i>SIRPG</i>    | 0.9905649 | 1.72E-22 |
| <i>LIMD2</i>    | 0.44979522 | 4.69E-10 | <i>TTC24</i>    | 1.4625452 | 1.87E-22 |
| <i>VMO1</i>     | 0.54883222 | 4.94E-10 | <i>ENTPD1</i>   | 0.4744904 | 1.87E-22 |
| <i>PPP1R16B</i> | 0.54205109 | 5.18E-10 | <i>CPVL</i>     | 0.9802772 | 1.92E-22 |
| <i>ZAP70</i>    | 0.60308952 | 5.21E-10 | <i>GPR171</i>   | 1.1297639 | 1.93E-22 |
| <i>GYPC</i>     | 0.47513564 | 5.23E-10 | <i>PDE6G</i>    | 0.9076082 | 1.93E-22 |
| <i>PML</i>      | 0.33025402 | 5.25E-10 | <i>MRAS</i>     | 0.8299263 | 2.24E-22 |
| <i>FCER1G</i>   | 0.57963138 | 5.36E-10 | <i>CCDC88A</i>  | 0.8299384 | 2.33E-22 |
| <i>SIRPB2</i>   | 0.61346583 | 5.44E-10 | <i>BATF2</i>    | 0.7579468 | 2.35E-22 |
| <i>BST2</i>     | 0.78986715 | 5.55E-10 | <i>STAT4</i>    | 0.7011715 | 2.41E-22 |
| <i>ACKR4</i>    | 0.88686917 | 5.57E-10 | <i>TM6SF1</i>   | 0.9371607 | 2.68E-22 |
| <i>IFITM4P</i>  | 0.83298152 | 5.58E-10 | <i>CARD17</i>   | 1.4537274 | 2.96E-22 |
| <i>KIR2DL4</i>  | 1.02025561 | 5.92E-10 | <i>GPR141</i>   | 1.3388382 | 3.32E-22 |
| <i>ITGB7</i>    | 0.61761294 | 6.03E-10 | <i>WIPF1</i>    | 0.7073703 | 3.41E-22 |
| <i>IFI6</i>     | 0.72723584 | 6.07E-10 | <i>NFAM1</i>    | 0.7048778 | 3.53E-22 |
| <i>CREB3</i>    | 0.2384122  | 6.95E-10 | <i>RNF213</i>   | 0.6039043 | 3.70E-22 |
| <i>LAT2</i>     | 0.37862674 | 7.03E-10 | <i>RASSF2</i>   | 0.7581478 | 3.74E-22 |
| <i>TNFRSF8</i>  | 0.53870942 | 7.06E-10 | <i>DRAM1</i>    | 0.5590374 | 3.92E-22 |
| <i>HLA.FAS1</i> | 0.47953637 | 7.16E-10 | <i>SERPINF1</i> | 0.8577416 | 4.21E-22 |
| <i>B3GALT4</i>  | 0.36921524 | 7.59E-10 | <i>BASP1</i>    | 0.845902  | 4.72E-22 |
| <i>TSPAN4</i>   | 0.46301122 | 7.70E-10 | <i>C1R</i>      | 0.8637189 | 4.74E-22 |
| <i>SNAI3</i>    | 0.5326978  | 7.73E-10 | <i>TNFAIP6</i>  | 1.2406208 | 4.83E-22 |
| <i>CD79B</i>    | 0.6166064  | 7.89E-10 | <i>TMEM140</i>  | 0.4547261 | 5.12E-22 |
| <i>USF1</i>     | 0.22287121 | 8.46E-10 | <i>DPEP2</i>    | 0.8228936 | 5.70E-22 |
| <i>PDCD1LG2</i> | 0.71138195 | 8.96E-10 | <i>CTHRC1</i>   | 1.1440379 | 6.09E-22 |
| <i>OAS2</i>     | 0.70628778 | 9.03E-10 | <i>CYSLTR2</i>  | 1.0793701 | 6.82E-22 |
| <i>CD1D</i>     | 0.44204759 | 9.13E-10 | <i>ABI3</i>     | 0.6161554 | 7.12E-22 |
| <i>PLEKHO2</i>  | 0.40010964 | 9.22E-10 | <i>GIMAP1</i>   | 0.6190052 | 7.64E-22 |
| <i>ZNF804A</i>  | 0.79675002 | 9.32E-10 | <i>FTH1P22</i>  | 1.2898387 | 7.77E-22 |
| <i>FLI1</i>     | 0.41804356 | 9.50E-10 | <i>DSE</i>      | 0.7669848 | 7.77E-22 |
| <i>SAMD9</i>    | 0.5899858  | 9.52E-10 | <i>TESPA1</i>   | 0.8838026 | 8.50E-22 |
| <i>CLEC4G</i>   | 0.92580938 | 9.95E-10 | <i>LUM</i>      | 1.1165104 | 8.54E-22 |
| <i>CD101</i>    | 0.38853766 | 1.04E-09 | <i>AXL</i>      | 0.7605338 | 9.91E-22 |
| <i>TESPA1</i>   | 0.57658437 | 1.05E-09 | <i>DTHD1</i>    | 1.4720414 | 1.08E-21 |
| <i>CYBB</i>     | 0.63509357 | 1.06E-09 | <i>SLC37A2</i>  | 1.0354123 | 1.10E-21 |
| <i>HVCN1</i>    | 0.35374921 | 1.07E-09 | <i>EIF2AK2</i>  | 0.4081034 | 1.13E-21 |
| <i>RHOG</i>     | 0.24420639 | 1.07E-09 | <i>HLA.B</i>    | 0.6774056 | 1.24E-21 |
| <i>LMF2</i>     | 0.29283244 | 1.08E-09 | <i>KCNK13</i>   | 0.8879657 | 1.24E-21 |
| <i>NFATC1</i>   | 0.54398762 | 1.09E-09 | <i>NR3C1</i>    | 0.7477492 | 1.34E-21 |
| <i>CARD16</i>   | 0.43416319 | 1.10E-09 | <i>SNX10</i>    | 0.7375203 | 1.36E-21 |

|                 |            |          |                   |           |          |
|-----------------|------------|----------|-------------------|-----------|----------|
| <i>FERMT3</i>   | 0.51009539 | 1.14E-09 | <i>TRGC2</i>      | 1.2267605 | 1.40E-21 |
| <i>CECR1</i>    | 0.62269407 | 1.17E-09 | <i>DNAJC5B</i>    | 1.1624171 | 1.68E-21 |
| <i>FBLN7</i>    | 0.44260842 | 1.25E-09 | <i>CLEC12A</i>    | 1.3004808 | 1.83E-21 |
| <i>CNR2</i>     | 0.87810542 | 1.26E-09 | <i>OSCAR</i>      | 0.8414066 | 1.89E-21 |
| <i>CXCL16</i>   | 0.34839074 | 1.28E-09 | <i>CR1</i>        | 1.348205  | 2.00E-21 |
| <i>CRTAM</i>    | 0.87918827 | 1.31E-09 | <i>ZNF683</i>     | 1.5222471 | 2.13E-21 |
| <i>ISG15</i>    | 0.60903542 | 1.32E-09 | <i>MYO5A</i>      | 0.715103  | 2.19E-21 |
| <i>LILRB5</i>   | 0.67476425 | 1.35E-09 | <i>MEFV</i>       | 1.1568446 | 2.23E-21 |
| <i>IFIH1</i>    | 0.3750656  | 1.42E-09 | <i>HLA.DOB</i>    | 0.9542632 | 2.60E-21 |
| <i>FCRL3</i>    | 0.90231646 | 1.53E-09 | <i>DCSTAMP</i>    | 1.5680492 | 2.66E-21 |
| <i>STX4</i>     | 0.21480005 | 1.55E-09 | <i>NFATC1</i>     | 0.8323894 | 2.75E-21 |
| <i>DERL3</i>    | 0.62765527 | 1.56E-09 | <i>ETV7</i>       | 0.8062382 | 3.10E-21 |
| <i>FYB</i>      | 0.59443367 | 1.57E-09 | <i>CLMP</i>       | 0.9192358 | 3.14E-21 |
| <i>CITED2</i>   | 0.30355649 | 1.57E-09 | <i>POSTN</i>      | 1.3256821 | 3.15E-21 |
| <i>PLA2G2D</i>  | 1.13432353 | 1.61E-09 | <i>STOM</i>       | 0.6986391 | 3.20E-21 |
| <i>CD209</i>    | 0.69666822 | 1.61E-09 | <i>TNFSF10</i>    | 0.5454267 | 3.50E-21 |
| <i>STAB1</i>    | 0.51404713 | 1.62E-09 | <i>SLFN11</i>     | 0.8161261 | 3.66E-21 |
| <i>CCL19</i>    | 1.04634425 | 1.63E-09 | <i>C3</i>         | 1.318632  | 3.79E-21 |
| <i>CD69</i>     | 0.68053413 | 1.63E-09 | <i>CLEC4D</i>     | 1.468656  | 3.83E-21 |
| <i>TRAV17</i>   | 0.81630284 | 1.68E-09 | <i>TLR6</i>       | 0.8287632 | 3.86E-21 |
| <i>SPN</i>      | 0.51143813 | 1.75E-09 | <i>GBP6</i>       | 1.3498717 | 4.38E-21 |
| <i>CLECL1</i>   | 0.77783248 | 1.82E-09 | <i>TNFSF14</i>    | 0.867224  | 4.69E-21 |
| <i>CXCR4</i>    | 0.56766886 | 1.87E-09 | <i>AD000864.6</i> | 0.8713274 | 5.68E-21 |
| <i>PIP4K2A</i>  | 0.2513827  | 1.94E-09 | <i>CTSW</i>       | 1.1620741 | 6.93E-21 |
| <i>C10orf10</i> | 0.56159675 | 1.99E-09 | <i>XCL2</i>       | 1.360049  | 7.29E-21 |
| <i>CYP4F22</i>  | 0.74346883 | 2.00E-09 | <i>SPHK1</i>      | 0.9739985 | 7.36E-21 |
| <i>SCARF1</i>   | 0.34637673 | 2.01E-09 | <i>CTLA4</i>      | 0.8674134 | 7.93E-21 |
| <i>C2</i>       | 0.51781585 | 2.05E-09 | <i>TRGC1</i>      | 1.2363406 | 8.09E-21 |
| <i>FCRL1</i>    | 1.05178168 | 2.07E-09 | <i>PLA2G2D</i>    | 1.721291  | 8.25E-21 |
| <i>GPR171</i>   | 0.7122134  | 2.07E-09 | <i>ALPK2</i>      | 0.9598717 | 8.51E-21 |
| <i>FCGR2A</i>   | 0.56363659 | 2.17E-09 | <i>NNMT</i>       | 0.8946907 | 8.67E-21 |
| <i>SAMHD1</i>   | 0.36409445 | 2.24E-09 | <i>HTRA4</i>      | 1.1407171 | 8.87E-21 |
| <i>FCGR3A</i>   | 0.7700248  | 2.27E-09 | <i>SIRPB1</i>     | 1.2173692 | 9.72E-21 |
| <i>FOXP3</i>    | 0.4863162  | 2.27E-09 | <i>P2RY10</i>     | 1.1635726 | 1.03E-20 |
| <i>MIR22HG</i>  | 0.39272792 | 2.32E-09 | <i>SLAMF1</i>     | 0.8175494 | 1.09E-20 |
| <i>CD163</i>    | 0.78614868 | 2.37E-09 | <i>TLR2</i>       | 0.7747297 | 1.20E-20 |
| <i>FAM20A</i>   | 0.55229506 | 2.37E-09 | <i>FAM129A</i>    | 0.8632718 | 1.34E-20 |
| <i>SERPING1</i> | 0.60507258 | 2.42E-09 | <i>ODF3B</i>      | 0.7810197 | 1.34E-20 |
| <i>SAMSN1</i>   | 0.55035721 | 2.49E-09 | <i>RAB42</i>      | 0.7188761 | 1.50E-20 |
| <i>PYHIN1</i>   | 0.68271936 | 2.59E-09 | <i>CASS4</i>      | 0.8199316 | 1.52E-20 |
| <i>CR1</i>      | 0.86294805 | 2.68E-09 | <i>PRF1</i>       | 1.0037368 | 1.83E-20 |
| <i>MICE</i>     | 0.64690791 | 2.70E-09 | <i>TBC1D10C</i>   | 0.8013904 | 1.86E-20 |
| <i>LCP1</i>     | 0.59270531 | 2.75E-09 | <i>CD28</i>       | 0.8229312 | 1.91E-20 |
| <i>TRAV2</i>    | 0.82671029 | 2.76E-09 | <i>APOL4</i>      | 0.883459  | 1.96E-20 |
| <i>P2RY10</i>   | 0.75740502 | 2.78E-09 | <i>CD3D</i>       | 0.8866955 | 2.04E-20 |
| <i>NLRP1</i>    | 0.47336975 | 2.84E-09 | <i>IL1RN</i>      | 1.1103261 | 2.11E-20 |
| <i>MARK2P9</i>  | 0.76666944 | 2.88E-09 | <i>RGS1</i>       | 0.9709329 | 2.15E-20 |

|                  |            |          |                 |           |          |
|------------------|------------|----------|-----------------|-----------|----------|
| <i>JAK2</i>      | 0.40700009 | 2.97E-09 | <i>EMP3</i>     | 0.6836751 | 2.28E-20 |
| <i>IFIT5</i>     | 0.35770219 | 3.03E-09 | <i>KIR2DL4</i>  | 1.4841384 | 2.31E-20 |
| <i>FGL2</i>      | 0.6048821  | 3.14E-09 | <i>TNFRSF8</i>  | 0.7895021 | 2.31E-20 |
| <i>ARRDC5</i>    | 0.72999016 | 3.25E-09 | <i>VSIG4</i>    | 1.1407544 | 2.47E-20 |
| <i>CD244</i>     | 0.67815282 | 3.28E-09 | <i>SERPINB9</i> | 0.5109411 | 2.51E-20 |
| <i>LINC00519</i> | 0.7636086  | 3.31E-09 | <i>SH2B3</i>    | 0.4838674 | 2.57E-20 |
| <i>CSF3R</i>     | 0.71071333 | 3.34E-09 | <i>DCN</i>      | 1.0789203 | 2.64E-20 |
| <i>NCR1</i>      | 0.87294915 | 3.59E-09 | <i>SUCNR1</i>   | 1.1753339 | 2.65E-20 |
| <i>GRN</i>       | 0.27927669 | 3.64E-09 | <i>RTP4</i>     | 0.7434405 | 2.72E-20 |
| <i>FCGR2B</i>    | 0.70260651 | 3.76E-09 | <i>CD7</i>      | 0.992833  | 2.77E-20 |
| <i>MEI1</i>      | 0.52940919 | 4.15E-09 | <i>TRGV10</i>   | 1.3889731 | 2.83E-20 |
| <i>APOE</i>      | 0.83355831 | 4.16E-09 | <i>KYNU</i>     | 0.9094754 | 2.84E-20 |
| <i>STAT2</i>     | 0.30425681 | 4.18E-09 | <i>VAMP5</i>    | 0.7007205 | 2.86E-20 |
| <i>TRAV3</i>     | 0.84529727 | 4.25E-09 | <i>LAT2</i>     | 0.5557773 | 2.98E-20 |
| <i>TRIM38</i>    | 0.23592405 | 4.27E-09 | <i>SDS</i>      | 0.8641041 | 3.54E-20 |
| <i>TNFRSF9</i>   | 0.53603879 | 4.44E-09 | <i>TRANK1</i>   | 0.5822161 | 3.80E-20 |
| <i>P2RY8</i>     | 0.4554441  | 4.45E-09 | <i>CD40</i>     | 0.8251795 | 4.06E-20 |
| <i>LYL1</i>      | 0.35851802 | 4.46E-09 | <i>IKZF3</i>    | 0.9465938 | 4.13E-20 |
| <i>MX1</i>       | 0.63395029 | 4.51E-09 | <i>DHX58</i>    | 0.522092  | 4.25E-20 |
| <i>CCL18</i>     | 1.11320944 | 4.69E-09 | <i>MITF</i>     | 0.8193566 | 4.77E-20 |
| <i>CCR1</i>      | 0.52368498 | 4.80E-09 | <i>SULF1</i>    | 1.1638371 | 5.04E-20 |
| <i>CYSLTR2</i>   | 0.67266405 | 4.81E-09 | <i>SELPLG</i>   | 0.7381559 | 5.09E-20 |
| <i>ADAP2</i>     | 0.34172698 | 5.06E-09 | <i>LY9</i>      | 1.0216736 | 5.16E-20 |
| <i>HLA.V</i>     | 1.01792495 | 5.07E-09 | <i>RASGRP1</i>  | 0.8131915 | 5.27E-20 |
| <i>DAPK1</i>     | 0.64856133 | 5.10E-09 | <i>CXCR6</i>    | 0.8681274 | 5.61E-20 |
| <i>ARFGAP3</i>   | 0.29041282 | 5.11E-09 | <i>WDFY4</i>    | 0.8778255 | 5.61E-20 |
| <i>TNFRSF4</i>   | 0.44225429 | 5.23E-09 | <i>FRMD6</i>    | 0.8543936 | 5.63E-20 |
| <i>CXCL11</i>    | 0.95459777 | 5.27E-09 | <i>HRH2</i>     | 1.1412333 | 5.76E-20 |
| <i>APOBEC3H</i>  | 0.60140984 | 5.44E-09 | <i>SFMBT2</i>   | 0.7251141 | 5.91E-20 |
| <i>GIMAP4</i>    | 0.43863899 | 5.56E-09 | <i>FCRL3</i>    | 1.3391793 | 6.34E-20 |
| <i>DNAJC5B</i>   | 0.72793333 | 5.80E-09 | <i>JAK3</i>     | 0.6074639 | 6.64E-20 |
| <i>FOLR2</i>     | 0.69952845 | 5.90E-09 | <i>AVPR1A</i>   | 1.0563725 | 6.82E-20 |
| <i>C3</i>        | 0.82711988 | 5.93E-09 | <i>CCDC80</i>   | 1.1688597 | 7.15E-20 |
| <i>CST7</i>      | 0.58898177 | 6.28E-09 | <i>C19orf38</i> | 0.826148  | 7.55E-20 |

---
